# Supplementary material
Source: PubMed Central journal article supplement (PMC5677556)
Supplement: NIHMS910075-supplement-1.pdf [file NIHMS910075-supplement-1.pdf]

**Supplementary webappendix: Changes in cause-specific neonatal and 1-59 month child mortality in India from 2000 to 2015: nationally-representative mortality study of 1.3 million homes**

| <b>Webappendix contents</b> |                                                                                        | <b>Page</b> |
|-----------------------------|----------------------------------------------------------------------------------------|-------------|
| <b>A</b>                    | <b>Methods: Sub-national estimates of live births and child mortality in India</b>     | <b>2-4</b>  |
| <b>B</b>                    | <b>Methods: CD-10 Classification of neonatal deaths and deaths at ages 1-59 months</b> | <b>4-7</b>  |
| <b>C</b>                    | <b>Additional results</b>                                                              | <b>9-19</b> |

**A. Sub-national estimates of live births and child (under-five) mortality in India, 2000-2015**

The MDS intends to provide temporal trends of cause-specific mortality for 16 years (from 2000 to 2015) based on 2001-2013 verbal autopsy data. We undertook specific procedures to manage the input data quality and smooth the expected noise in annual data. The demographic framework previously published along with causes of neonatal and child mortality estimates for 2005 were based on aggregated 2001-2003 MDS data.<sup>1</sup>

India's SRS has continuously monitored births and deaths vital statistics since 1971 from its nationally representative samples, and the MDS has monitored the causes of death since 2001 within the Sample Registration System (SRS).<sup>2</sup> The United Nations Population Division (UNPD) and the United Nations Inter-agency Group for Child Mortality Estimation's (IGME) national estimates were partitioned for each of India's 35 states and union territories (UT) by using the population data from 1991-2011 Censuses of India and vital statistics from the SRS.<sup>2-4</sup> (appendix figure 1) To obtain a consistent smooth periodic trend, we used SRS data from 1998 onwards to calculate three-year backward moving averages for live births and under-five mortality for 2000 onwards to 2014. For 2014 and 2015 years we used backward moving averages of 2013 to 2014.

SRS vital statistics, sex ratio at birth, proportion of infant deaths that occur in the neonatal period, infant mortality rates, and under-five mortality rates are available for bigger states, which have more than ten million residents. ( There are no official SRS estimates for Telangana, a new state established in 2014 as a partition of Andhra Pradesh. SRS vital statistics are not published for smaller states. For these states we used the estimates from an adjacent big state as follows:

- Haryana for Chandigarh
- Uttar Pradesh for Uttaranchal
- Assam for each of Sikkim, Arunachal Pradesh, Nagaland, Manipur, Tripura and Mizoram
- Gujarat for each of Daman-Diu and Dadra & Nagar Haveli
- Maharashtra for Goa
- Kerala for Lakshadweep
- Tamil Nadu for Pondicherry
- Karnataka for A&N Islands

We use SRS rates for our sub-national mortality envelopes (adjusted to the UN estimated national totals) because SRS has been independently judged to have better ascertainment rates than the National Family Health Surveys (NFHS) and District Level Household Surveys (DLHS) in India.<sup>5-7</sup> In contrast to these surveys, the SRS uses a continuous registration method with dual ascertainment of events in contrast to single retrospective review of child births and deaths and provides corresponding death rates for adults. Exceptions were made for states for which SRS data were not available or inconsistent. Specifically, we used estimated values from a fitted regression on pooled data from SRS vital rates, NFHS-3 and DLHS-2 rates for Jharkhand and Chhattisgarh, which became new states in 2001. For Jammu & Kashmir and Delhi, the 2004 SRS rate were used for prior years because SRS did not report reliable rates prior to 2004. Slight differences between current estimates for 2001-2003 in this publication and those from our previously published are due to updates in records.<sup>1</sup>

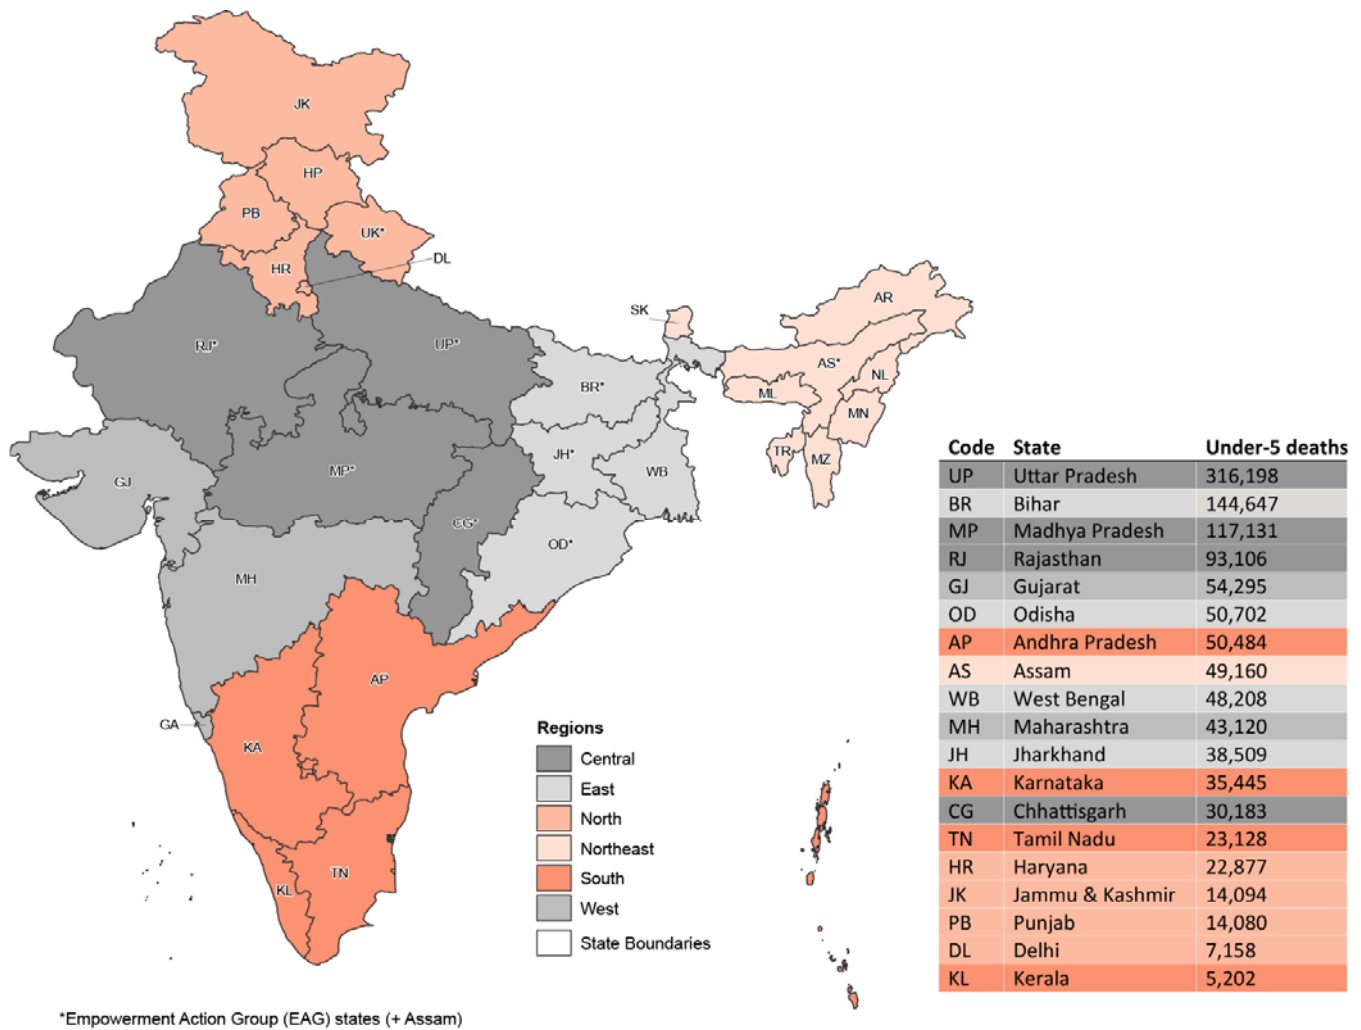

Appendix Figure 1. States and major regions of India and estimated child (under-five) deaths for big states in 2015.

State-level, gender and urban/rural estimates of live births, neonatal deaths and deaths at ages 1-59 months were calculated for each year from 2000 to 2015. The calculations were adjusted to reflect the UNPD estimates for live births and IGME’s estimates for neonatal, infant, and under-five deaths in India for the period 2000-2015 as follows:

**1. Live births**

We used census projections of India’s population for 1991, 2001, and 2011 to interpolate annual population by five-year age groups and by gender for rural and urban areas of each state yielding 140 strata for 35 states and UT. The annual national population was multiplied by annual SRS crude birth rates multiplied by the SRS sex ratios. The resulting total numbers of live births by gender were then adjusted to reflect the UNPD gender-specific totals for India and then proportionately redistributed for each stratum.

**2. Under-five child deaths**

**2.1 Infant deaths**

We estimated total infant deaths by multiplying annual live birth estimates by the corresponding SRS infant mortality rates.

## **webappendix: Changes in cause-specific in neonatal and 1-59 month child mortality in India from 2000 to 2015**

No SRS infant mortality rate estimates were available for the following small states: Arunachal Pradesh, Chandigarh, Dadra and Nagar Haveli, Daman and Diu, Goa, Lakshadweep, Manipur, Meghalaya, Mizoram, Nagaland, Pondicherry, Sikkim, Tripura, Uttarakhand and A & N Islands. Thus, the relevant reference big state's infant mortality rate was applied to the small states as described above in Section A. Urban and rural deaths were determined in proportion to SRS urban and rural deaths. These estimates were finally adjusted to reflect the UN IGME infant mortality estimates for India.

### **2.2 Neonatal deaths**

We calculated total neonatal deaths by multiplying the total infant deaths from step (2.1) by the proportion of neonatal to infant mortality rates (at the state level and by urban/rural area) reported by the SRS. We adjusted these estimates to reflect the IGME neonatal mortality estimates for India. To stratify by gender, weighted male to female death proportions from the MDS were calculated using three yearly backward moving averages. Gender specific death totals in each state were then multiplied by the corresponding urban to rural ratio of SRS neonatal mortality rates.

### **2.3 Child -under 5 deaths (0-4 years)**

SRS mortality estimates for total child deaths do not use live births as a denominator. Therefore, under-five deaths were estimated for each year from 2000 to 2015 using the following steps:

- (a) From the annual census projections of the population of India<sup>2,3</sup> the under-five age population, by gender for each urban and rural area of each state, was extracted and was adjusted to reflect the gender-specific under-five UNPD population estimates for India.<sup>4</sup>
- (b) To calculate the under-five deaths, we multiplied the population of each urban and rural area of each state by the corresponding gender specific SRS crude death rates and then adjusted these to IGME under-five death totals for corresponding years.

### **2.3 Other age groups**

- (a) Total deaths between 29 days and one year were calculated by subtracting the neonatal deaths from step (2.2) from the infant deaths from step (2.1).
- (b) Total deaths at ages 1-59 months were calculated by subtracting the neonatal deaths in step (2.2) from the under-five deaths of step (2.3).

## **3. Mortality rates**

Mortality rates for neonates, for children at ages 1-59 months and for children under-five years were calculated for both genders and for urban and rural areas of each state using the adjusted estimates of total deaths and live births described above. We used simple annual rates of change to compare three six-year periods corresponding to the years prior to the NHM (2000-2005), roll out phase of the NHM programs (2005-2010) and post-NHM implementation (2010-2015):

$$\text{Average annual percent change} = \text{Average}((Y_2 - Y_1)/Y_1, (Y_3 - Y_2)/Y_2, (Y_4 - Y_3)/Y_3, (Y_5 - Y_4)/Y_4, (Y_6 - Y_5)/Y_5) * 100$$

### **Uncertainty in the underlying demographic estimates**

The major source of uncertainty in the regional and gender variation in cause-specific mortality rates in this study is the cause of death proportion. The UN annual estimates of total number of live births and deaths by country are widely accepted and the corresponding uncertainty bounds are also made available by the UNPD and IGME. The SRS does not publish uncertainty bounds for each state by residence type, and without those, sub-national uncertainty estimates cannot be generated.

### **B. ICD-10 Classification of neonatal deaths and deaths at ages 1-59 months**

Three-character International Classification of Diseases (ICD-10)<sup>8</sup> codes were assigned to each child death; inconsistencies in coding (after adjudication) were revised and, if necessary, re-classified with input from the Child Health and Epidemiology Reference Group (CHERG).<sup>9</sup> Two classification systems were developed for the causes of neonatal deaths (appendix box 1) and deaths among children aged 1-59 months (appendix box 2).

Infections during the neonatal period are difficult to classify using verbal autopsy, given the large overlap in symptoms and signs during the neonatal period, and especially during the first 1-2 weeks of life, when most of these deaths occurred. For this reason, neonatal pneumonias, sepsis and CNS infections are combined under a common category 'Neonatal infections'. Similarly, given the difficulty in separating prematurity from low birthweight outside hospital settings, these two conditions are kept together as the category 'Prematurity/ low birthweight'.

Specific rules were used when assigning final cause of death to neonatal tetanus. Deaths coded as tetanus (A33) before the

## **webappendix: Changes in cause-specific in neonatal and 1-59 month child mortality in India from 2000 to 2015**

third day of life were re-classified according to the alternative ICD-10 codes assigned either by the physicians during the coding process or available keywords to either bacterial sepsis of the newborn (P36), central nervous system infections (A80-A89) or birth asphyxia/trauma (P21, P10-P15).

### **References**

1. Million Death Study Collaborators. Causes of neonatal and child mortality in India: a nationally representative mortality survey. *Lancet* 2010; 376(9755): 1853-60.
2. Registrar General of India. Sample Registration System Statistical Report 2013. New Delhi: Office of the Registrar General of India, 2014.
3. United Nations Inter-agency Group for Child Mortality Estimation. Levels and trends in child mortality: Report 2015. New York: UNICEF, 2015.
4. United Nations Population Division. World population prospects: the 2015 revision. New York: United Nations; 2015.
5. International Institute for Population Sciences (IIPS). District Level Household Survey (DLHS-2), 2002-04: India. Mumbai, 2006.
6. International Institute for Population Sciences (IIPS). National Family Health Survey, 2005-06. India. Mumbai: IIPS, 2008.
7. Saikia N, Jasilionis D, Ram F, Shkolnikov VM. Trends and geographic differentials in mortality under age 60 in India. *Popul Stud* 2011; 65(1): 73-89.
8. World Health Organization. ICD-10: international statistical classification of diseases and related health problems. 10th revision. Geneva: World Health Organization; 1992.
9. Liu L, Oza S, Hogan D, et al. Global, regional, and national causes of child mortality in 2000-13, with projections to inform post-2015 priorities: an updated systematic analysis. *Lancet* 2015; 385(9966): 430-40.

**webappendix: Changes in cause-specific in neonatal and 1-59 month child mortality in India from 2000 to 2015**

**Box 1: Cause of death classification for neonates**

| Disease                                                   | ICD-10 range                                                                                                                                                                                                                                                                                                                                                                                                                                                                                                                                                            |
|-----------------------------------------------------------|-------------------------------------------------------------------------------------------------------------------------------------------------------------------------------------------------------------------------------------------------------------------------------------------------------------------------------------------------------------------------------------------------------------------------------------------------------------------------------------------------------------------------------------------------------------------------|
| <b>Communicable, perinatal and nutritional conditions</b> |                                                                                                                                                                                                                                                                                                                                                                                                                                                                                                                                                                         |
| Prematurity/low birthweight<br>Birth asphyxia/trauma      | P01, P05, P07, P22, P25-P28, P52, P61, P77, R04<br>P00, P02, P03, P10-P15, P20, P21, P24, P29, P50, P90, P91                                                                                                                                                                                                                                                                                                                                                                                                                                                            |
| <b>Neonatal infections</b>                                |                                                                                                                                                                                                                                                                                                                                                                                                                                                                                                                                                                         |
| Neonatal pneumonia                                        | A37, H65-H68, H70, H71, J00-J22, J32, J36, J85, J86, P23, U04                                                                                                                                                                                                                                                                                                                                                                                                                                                                                                           |
| Meningitis/encephalitis                                   | A39, A81-A89, G00-G09                                                                                                                                                                                                                                                                                                                                                                                                                                                                                                                                                   |
| Sepsis                                                    | A20-A28, A32, A38, A40-A44, A46, A48, A49, A68-A70, A74, A75, A77-A79, B95, B96, H10, H60, I30, I32-I33, I39-I41, K65, K67, K81, L00-L04, L08, M00-M01, M60, M86, N10, N30, N34, N41, N49, N61, P35-P39                                                                                                                                                                                                                                                                                                                                                                 |
| Tetanus                                                   | A33-A35                                                                                                                                                                                                                                                                                                                                                                                                                                                                                                                                                                 |
| <b>Other conditions</b>                                   |                                                                                                                                                                                                                                                                                                                                                                                                                                                                                                                                                                         |
| Diarrhoea                                                 | A00-A09                                                                                                                                                                                                                                                                                                                                                                                                                                                                                                                                                                 |
| Poliomyelitis                                             | A80, B91                                                                                                                                                                                                                                                                                                                                                                                                                                                                                                                                                                |
| Measles                                                   | B01, B05                                                                                                                                                                                                                                                                                                                                                                                                                                                                                                                                                                |
| Malaria                                                   | B50-B54                                                                                                                                                                                                                                                                                                                                                                                                                                                                                                                                                                 |
| Other infectious and parasitic diseases                   | A15-A19, A30-A31, A36, A50-A67, A71, A90-A99, B00, B02-B04, B06-B09, B15-B27, B30, B33-B49, B55-B60, B64-B83, B85-B90, B92, B94, B97, B99, J65, K04, K05, K61, N70-N74, R50, R75, U00, Y95                                                                                                                                                                                                                                                                                                                                                                              |
| Nutritional                                               | D50-D53, E00-E02, E40-E46, E50-E56, E59-E61, E63, E64, X53-X54                                                                                                                                                                                                                                                                                                                                                                                                                                                                                                          |
| Other perinatal conditions                                | P96                                                                                                                                                                                                                                                                                                                                                                                                                                                                                                                                                                     |
| <b>Non-communicable diseases</b>                          |                                                                                                                                                                                                                                                                                                                                                                                                                                                                                                                                                                         |
| Congenital                                                | G10-G99, Q00-Q99                                                                                                                                                                                                                                                                                                                                                                                                                                                                                                                                                        |
| Non-communicable                                          | C00-C97, D01-D48, D55-D89, E03-E35, E65-E90, F00-F99, H00-H06, H11-H59, H61-H62, H69, H72-H95, I00-I28, I31, I34-I38, I42-I99, J30, J31, J33-J35, J37-J47, J60, J64, J66-J70, J80-J82, J84, J90-J99, K00-K03, K06-K60, K62-K63, K70-K80, K82-K93, L05, L10-L99, M02-M54, M61-M85, M87-M99, N00-N08, N11-N29, N31-N33, N35-N40, N42-N48, N50-N51, N60, N62-N64, N75-N99, P04, P08, P51, P53-P60, P70-P72, P74-P76, P78, P80-P83, P92-P94, R00, R01, R03, R05, R06, R11-R23, R26, R27, R29-R36, R39-R49, R55, R56, R59, R63, R70-R74, R76-R77, R80-R82, R84-R87, R90, R91 |
| <b>Injuries</b>                                           | S00-S99, T00-T98, V01-V99, W00-W99, X00-X52, X57-X99, Y00-Y91, Y97-Y98                                                                                                                                                                                                                                                                                                                                                                                                                                                                                                  |
| <b>Ill-defined or cause unknown</b>                       | R02, R07, R09, R10, R25, R51-R54, R57-R58, R60-R62, R64, R68, R69, R78, R79, R83, R89, R92-R99                                                                                                                                                                                                                                                                                                                                                                                                                                                                          |

**webappendix: Changes in cause-specific in neonatal and 1-59 month child mortality in India from 2000 to 2015**

**Box 2: Cause of death classification for deaths at 1-59 months**

| Disease                                                   | ICD-10 range                                                                                                                                                                                                                                                                                                                                                                                                                                                                                                                                                              |
|-----------------------------------------------------------|---------------------------------------------------------------------------------------------------------------------------------------------------------------------------------------------------------------------------------------------------------------------------------------------------------------------------------------------------------------------------------------------------------------------------------------------------------------------------------------------------------------------------------------------------------------------------|
| <b>Communicable, perinatal and nutritional conditions</b> |                                                                                                                                                                                                                                                                                                                                                                                                                                                                                                                                                                           |
| Pneumonia                                                 | A37, H65-H68, H70, H71, J00-J22, J32, J36, J85, J86, P23, U04                                                                                                                                                                                                                                                                                                                                                                                                                                                                                                             |
| Diarrhoea                                                 | A00-A09                                                                                                                                                                                                                                                                                                                                                                                                                                                                                                                                                                   |
| Acute bacterial sepsis and severe infections              | A20-A28, A32, A38, A40-A44, A46, A48, A49, A68-A70, A74, A75, A77-A79, B95, B96, H10, H60, I30, I32, I33, I39-I41, K65, K67, K81, L00-L04, L08, M00-M01, M60, M86, N10, N30, N34, N41, N49, N61, P36, P38                                                                                                                                                                                                                                                                                                                                                                 |
| Measles                                                   | B01, B05                                                                                                                                                                                                                                                                                                                                                                                                                                                                                                                                                                  |
| Malaria                                                   | B50-B54                                                                                                                                                                                                                                                                                                                                                                                                                                                                                                                                                                   |
| Meningitis/encephalitis                                   | A39, A81-A89, G00-G09                                                                                                                                                                                                                                                                                                                                                                                                                                                                                                                                                     |
| <b>Other infections</b>                                   |                                                                                                                                                                                                                                                                                                                                                                                                                                                                                                                                                                           |
| Tuberculosis                                              | A15-A19, B90, J65                                                                                                                                                                                                                                                                                                                                                                                                                                                                                                                                                         |
| Tetanus                                                   | A33-A35                                                                                                                                                                                                                                                                                                                                                                                                                                                                                                                                                                   |
| Poliomyelitis                                             | A80, B91                                                                                                                                                                                                                                                                                                                                                                                                                                                                                                                                                                  |
| HIV/AIDS                                                  | B20-B24, R75                                                                                                                                                                                                                                                                                                                                                                                                                                                                                                                                                              |
| Other infectious and parasitic diseases                   | A30, A31, A36, A50-A67, A71, A90-A99, B00, B02-B04, B06-B09, B15-B19, B25-B27, B30, B33-B49, B55-B60, B64-B83, B85-B89, B92, B94, B97, B99, K02, K04, K05, K61, N70-N74, P35, P37, P39, U00, Y95                                                                                                                                                                                                                                                                                                                                                                          |
| Fever of unknown origin                                   | R50                                                                                                                                                                                                                                                                                                                                                                                                                                                                                                                                                                       |
| Nutritional                                               | D50-D53, E00-E02, E40-E46, E50-E56, E59-E61, E63, E64, X53-X54                                                                                                                                                                                                                                                                                                                                                                                                                                                                                                            |
| Perinatal conditions                                      | P00-P04, P05-P07, P10-P15, P20-P22, P24-P29, P50, P52, P61, P77, P90-P91, P96                                                                                                                                                                                                                                                                                                                                                                                                                                                                                             |
| <b>Non-communicable diseases</b>                          |                                                                                                                                                                                                                                                                                                                                                                                                                                                                                                                                                                           |
| Congenital                                                | Q00-Q07, Q10-18, Q20-Q28, Q30-Q45, Q50-56, Q60-Q87, Q89-Q93, Q95, Q96-Q99                                                                                                                                                                                                                                                                                                                                                                                                                                                                                                 |
| Non-communicable                                          | C00-C97, D01-D48, D55-D89, E03-E35, E65-E90, F00-F99, G10-G99, H00-H06, H11-H59, H61-H62, H69, H72-H95, I00-I28, I31, I34-I38, I42-I99, J30, J31, J33-J35, J37-J47, J60, J64, J66-J70, J80-J82, J84, J90-J99, K00-K01, K03, K06-K60, K62-K63, K70-K80, K82-K93, L05, L10-L99, M02-M54, M61-M85, M87-M99, N00-N08, N11-N29, N31-N33, N35-N40, N42-N48, N50-N51, N60, N62-N64, N75-N99, P04, P08, P51, P53-P60, P70-P72, P74-P76, P78, P80-P83, P92-P94, R00, R01, R03-R05, R06, R11-R23, R26, R27, R29-R49, R55-R56, R59, R63, R70-R74, R76-R77, R80-R82, R84-R87, R90-R91 |
| <b>Injuries</b>                                           | S00-S99, T00-T98, V01-V99, W00-W99, X00-X52, X57-X99, Y00-Y91, Y97-Y98                                                                                                                                                                                                                                                                                                                                                                                                                                                                                                    |
| <b>Ill-defined or cause unknown</b>                       | R02, R07, R09, R10, R25, R51-R54, R57-R58, R60-R62, R64, R68, R69, R78, R79, R83, R89, R92-R99                                                                                                                                                                                                                                                                                                                                                                                                                                                                            |

**webappendix: Changes in cause-specific in neonatal and 1-59 month child mortality in India from 2000 to 2015**

**C. Additional results**

**Appendix Table 1: Annual study deaths by cause from the Million Death Study, India 2001-2013. A total of 94,309 under-five child deaths with verbal autopsies were coded by physicians.**

| Causes of death                              | Year        |             |             |             |             |             |             |             |             |             |             |             |             | Total        |
|----------------------------------------------|-------------|-------------|-------------|-------------|-------------|-------------|-------------|-------------|-------------|-------------|-------------|-------------|-------------|--------------|
|                                              | 2001        | 2002        | 2003        | 2004        | 2005        | 2006        | 2007        | 2008        | 2009        | 2010        | 2011        | 2012        | 2013        |              |
| <b>Neonatal (age 0-28 days)</b>              |             |             |             |             |             |             |             |             |             |             |             |             |             |              |
| Prematurity/low birthweight                  | 1100        | 1432        | 1099        | 1404        | 1852        | 1947        | 1941        | 1947        | 1979        | 1840        | 1714        | 1639        | 1575        | 21469        |
| Neonatal infections*                         | 1093        | 1039        | 751         | 891         | 986         | 869         | 780         | 747         | 725         | 723         | 590         | 586         | 572         | 10352        |
| Birth asphyxia/trauma                        | 681         | 800         | 592         | 764         | 811         | 774         | 697         | 670         | 517         | 503         | 414         | 469         | 400         | 8092         |
| Non-communicable                             | 190         | 208         | 161         | 288         | 336         | 356         | 347         | 304         | 316         | 267         | 207         | 266         | 241         | 3487         |
| Congenital                                   | 116         | 139         | 104         | 167         | 227         | 221         | 235         | 220         | 198         | 139         | 123         | 164         | 141         | 2194         |
| Diarrhoea                                    | 114         | 122         | 101         | 131         | 164         | 160         | 120         | 125         | 143         | 139         | 91          | 107         | 101         | 1618         |
| Injuries                                     | 14          | 19          | 14          | 22          | 30          | 29          | 27          | 26          | 19          | 35          | 26          | 45          | 24          | 330          |
| Tetanus                                      | 98          | 98          | 68          | 75          | 106         | 98          | 100         | 60          | 42          | 33          | 15          | 14          | 8           | 815          |
| Other conditions†                            | 16          | 13          | 5           | 32          | 30          | 47          | 37          | 49          | 50          | 26          | 25          | 33          | 24          | 387          |
| Other perinatal conditions                   | 175         | 207         | 179         | 269         | 360         | 344         | 373         | 252         | 200         | 180         | 150         | 167         | 125         | 2981         |
| Ill-defined‡                                 | 31          | 67          | 46          | 63          | 38          | 46          | 56          | 52          | 36          | 28          | 23          | 18          | 23          | 527          |
| <b>All causes</b>                            | <b>3628</b> | <b>4144</b> | <b>3120</b> | <b>4106</b> | <b>4940</b> | <b>4891</b> | <b>4713</b> | <b>4452</b> | <b>4225</b> | <b>3913</b> | <b>3378</b> | <b>3508</b> | <b>3234</b> | <b>52252</b> |
| <b>1-59 months</b>                           |             |             |             |             |             |             |             |             |             |             |             |             |             |              |
| Pneumonia                                    | 1383        | 1164        | 885         | 867         | 1076        | 988         | 946         | 809         | 780         | 660         | 600         | 480         | 410         | 11048        |
| Diarrhoea                                    | 1048        | 893         | 775         | 783         | 833         | 730         | 761         | 611         | 608         | 481         | 376         | 331         | 294         | 8524         |
| Non-communicable                             | 350         | 323         | 275         | 274         | 364         | 339         | 341         | 305         | 314         | 238         | 249         | 189         | 188         | 3749         |
| Injuries                                     | 304         | 245         | 208         | 228         | 316         | 283         | 272         | 245         | 235         | 266         | 242         | 204         | 174         | 3222         |
| Other infections§                            | 391         | 290         | 249         | 315         | 460         | 448         | 351         | 341         | 320         | 301         | 248         | 221         | 158         | 4093         |
| Congenital                                   | 94          | 116         | 95          | 130         | 144         | 149         | 169         | 152         | 124         | 105         | 110         | 109         | 107         | 1604         |
| Nutritional                                  | 94          | 129         | 119         | 129         | 209         | 220         | 181         | 170         | 158         | 146         | 123         | 88          | 78          | 1844         |
| Malaria                                      | 263         | 176         | 148         | 146         | 217         | 222         | 183         | 140         | 171         | 153         | 129         | 94          | 58          | 2100         |
| Meningitis/encephalitis                      | 168         | 125         | 148         | 184         | 185         | 154         | 148         | 130         | 126         | 93          | 71          | 60          | 58          | 1650         |
| Acute bacterial sepsis and severe infections | 109         | 173         | 78          | 82          | 56          | 60          | 51          | 33          | 37          | 35          | 25          | 26          | 19          | 784          |
| Measles                                      | 319         | 225         | 214         | 110         | 123         | 130         | 88          | 93          | 73          | 39          | 34          | 25          | 13          | 1486         |
| Perinatal conditions¶                        | 89          | 96          | 78          | 131         | 30          | 4           | 8           | 9           | 7           | 2           | 4           | -           | -           | 458          |
| Ill-defined‡                                 | 139         | 149         | 133         | 86          | 127         | 160         | 167         | 117         | 90          | 95          | 99          | 88          | 55          | 1495         |
| <b>All causes</b>                            | <b>4751</b> | <b>4104</b> | <b>3405</b> | <b>3465</b> | <b>4140</b> | <b>3877</b> | <b>3666</b> | <b>3155</b> | <b>3043</b> | <b>2614</b> | <b>2310</b> | <b>1915</b> | <b>1612</b> | <b>42057</b> |
| <b>Under-five all causes</b>                 | <b>8379</b> | <b>8248</b> | <b>6525</b> | <b>7571</b> | <b>9080</b> | <b>8768</b> | <b>8379</b> | <b>7607</b> | <b>7268</b> | <b>6527</b> | <b>5688</b> | <b>5423</b> | <b>4846</b> | <b>94309</b> |

**Notes:** \*Neonatal infections are predominantly pneumonia, followed by sepsis and meningitis/encephalitis. †Other conditions for neonatal deaths include polio, measles, malaria, other infectious and parasitic diseases, and nutritional diseases. ‡Ill-defined conditions include all ICD-10 'R' codes that have not been assigned to defined cause groups. Ill-defined causes averaged 1% in neonatal death and 4% in child death, and decreased in proportion over time. §Other infections for 1-59 months deaths include TB, tetanus, polio, HIV/AIDS, and other infectious and parasitic diseases. ¶Improvement in physician cause assignment reduced the number of deaths at ages 1-59 months misclassified as perinatal.



**webappendix: Changes in cause-specific in neonatal and 1-59 month child mortality in India from 2000 to 2015**

**Appendix Table 2: Annualized mortality rate per 1000 live births in India, 2000-2015.**

| Study deaths                    | Year         |                         |                         |                         |                         |                         |                         |                         |                         |                         |                         |                         |                         |                         |                         |                         |                         |
|---------------------------------|--------------|-------------------------|-------------------------|-------------------------|-------------------------|-------------------------|-------------------------|-------------------------|-------------------------|-------------------------|-------------------------|-------------------------|-------------------------|-------------------------|-------------------------|-------------------------|-------------------------|
|                                 | 2001-13      | 2000                    | 2001                    | 2002                    | 2003                    | 2004                    | 2005                    | 2006                    | 2007                    | 2008                    | 2009                    | 2010                    | 2011                    | 2012                    | 2013                    | 2014                    | 2015                    |
| Live births (M)*                |              | 27.9                    | 27.9                    | 27.9                    | 27.8                    | 27.7                    | 27.6                    | 27.5                    | 27.3                    | 27.1                    | 26.8                    | 26.6                    | 26.3                    | 26.1                    | 26.0                    | 25.9                    | 25.8                    |
| <b>Neonatal<br/>(90% CI)</b>    | <b>52252</b> | <b>45.0</b><br>(42, 49) | <b>43.6</b><br>(41, 47) | <b>42.2</b><br>(39, 46) | <b>40.8</b><br>(38, 44) | <b>39.3</b><br>(37, 43) | <b>38.1</b><br>(35, 41) | <b>37.0</b><br>(34, 40) | <b>36.0</b><br>(33, 39) | <b>35.0</b><br>(32, 38) | <b>33.9</b><br>(31, 37) | <b>32.8</b><br>(30, 36) | <b>31.6</b><br>(29, 35) | <b>30.3</b><br>(28, 34) | <b>29.0</b><br>(27, 33) | <b>27.9</b><br>(25, 32) | <b>27.0</b><br>(24, 32) |
| Girls                           | 23208        | 41.1                    | 39.8                    | 39.6                    | 38.3                    | 37.4                    | 36.8                    | 35.1                    | 34.1                    | 32.5                    | 31.9                    | 31.1                    | 29.5                    | 27.9                    | 26.8                    | 26.2                    | 26.8                    |
| Boys                            | 29044        | 48.5                    | 47.0                    | 44.6                    | 43.0                    | 41.1                    | 39.3                    | 38.7                    | 37.7                    | 37.1                    | 35.8                    | 34.3                    | 33.4                    | 32.5                    | 31.0                    | 29.4                    | 27.1                    |
| Rural                           | 29044        | 49.7                    | 48.1                    | 46.7                    | 45.1                    | 43.7                    | 42.4                    | 41.2                    | 40.3                    | 39.4                    | 38.4                    | 37.2                    | 36.0                    | 34.8                    | 33.4                    | 32.1                    | 31.1                    |
| Urban                           | 23208        | 28.8                    | 28.1                    | 27.1                    | 26.2                    | 24.9                    | 24.2                    | 23.3                    | 22.4                    | 21.2                    | 20.4                    | 19.6                    | 18.6                    | 17.3                    | 16.1                    | 15.5                    | 15.0                    |
| Poorer states†                  | 29353        | 51.9                    | 50.1                    | 48.2                    | 46.6                    | 45.3                    | 44.2                    | 42.8                    | 41.6                    | 40.6                    | 39.5                    | 38.4                    | 37.2                    | 35.9                    | 34.3                    | 32.9                    | 31.8                    |
| Richer states                   | 22899        | 36.0                    | 35.2                    | 34.4                    | 33.1                    | 31.4                    | 30.0                    | 29.0                    | 28.2                    | 27.2                    | 26.1                    | 25.0                    | 23.6                    | 22.5                    | 21.5                    | 20.8                    | 20.1                    |
| <b>1-59 months<br/>(90% CI)</b> | <b>42057</b> | <b>45.2</b><br>(43, 50) | <b>43.3</b><br>(41, 47) | <b>41.4</b><br>(39, 45) | <b>39.5</b><br>(37, 43) | <b>37.7</b><br>(35, 42) | <b>35.8</b><br>(33, 40) | <b>34.1</b><br>(31, 38) | <b>32.3</b><br>(30, 36) | <b>30.6</b><br>(28, 34) | <b>28.9</b><br>(26, 32) | <b>27.2</b><br>(24, 31) | <b>25.6</b><br>(22, 29) | <b>23.8</b><br>(20, 28) | <b>22.4</b><br>(18, 27) | <b>20.8</b><br>(16, 26) | <b>19.6</b><br>(15, 26) |
| Girls                           | 21841        | 54.2                    | 52.1                    | 49.0                    | 46.8                    | 43.7                    | 41.2                    | 39.7                    | 38.0                    | 36.6                    | 34.3                    | 32.1                    | 30.5                    | 28.7                    | 26.7                    | 24.3                    | 21.2                    |
| Boys                            | 20216        | 37.0                    | 35.3                    | 34.5                    | 33.0                    | 32.2                    | 31.0                    | 29.0                    | 27.2                    | 25.3                    | 24.1                    | 22.8                    | 21.2                    | 19.4                    | 18.5                    | 17.7                    | 18.1                    |
| Rural                           | 20216        | 49.6                    | 47.6                    | 45.2                    | 42.9                    | 41.0                    | 39.5                    | 38.0                    | 36.0                    | 33.9                    | 31.6                    | 29.6                    | 27.5                    | 25.3                    | 23.6                    | 22.0                    | 20.9                    |
| Urban                           | 21841        | 30.0                    | 28.5                    | 28.5                    | 28.3                    | 26.6                    | 23.8                    | 21.3                    | 20.6                    | 20.5                    | 20.7                    | 20.2                    | 20.2                    | 19.3                    | 18.7                    | 17.3                    | 15.8                    |
| Poorer states                   | 25565        | 56.2                    | 53.9                    | 51.2                    | 48.6                    | 46.0                    | 44.2                    | 42.4                    | 40.1                    | 37.8                    | 35.6                    | 33.8                    | 31.7                    | 29.4                    | 27.6                    | 25.8                    | 24.4                    |
| Richer states                   | 16492        | 31.0                    | 29.6                    | 28.6                    | 27.7                    | 26.6                    | 24.5                    | 22.7                    | 21.6                    | 20.8                    | 19.6                    | 18.1                    | 17.2                    | 16.0                    | 14.9                    | 13.8                    | 12.6                    |
| <b>Under-five<br/>(90% CI)</b>  | <b>94309</b> | <b>90.1</b><br>(88, 95) | <b>86.9</b><br>(85, 91) | <b>83.6</b><br>(81, 88) | <b>80.3</b><br>(78, 84) | <b>77.0</b><br>(75, 81) | <b>74.0</b><br>(72, 78) | <b>71.1</b><br>(69, 75) | <b>68.3</b><br>(66, 72) | <b>65.6</b><br>(62, 69) | <b>62.8</b><br>(60, 66) | <b>60.0</b><br>(57, 63) | <b>57.2</b><br>(54, 61) | <b>54.2</b><br>(51, 59) | <b>51.4</b><br>(48, 57) | <b>48.8</b><br>(45, 55) | <b>46.6</b><br>(42, 53) |
| Girls                           | 45049        | 95.3                    | 91.9                    | 88.6                    | 85.1                    | 81.1                    | 78.0                    | 74.9                    | 72.0                    | 69.1                    | 66.1                    | 63.2                    | 60.0                    | 56.6                    | 53.5                    | 50.5                    | 48.0                    |
| Boys                            | 49260        | 85.5                    | 82.3                    | 79.0                    | 76.0                    | 73.3                    | 70.4                    | 67.6                    | 64.9                    | 62.4                    | 59.8                    | 57.2                    | 54.6                    | 51.9                    | 49.4                    | 47.2                    | 45.2                    |
| Rural                           | 49260        | 99.3                    | 95.7                    | 91.8                    | 88.0                    | 84.7                    | 81.9                    | 79.2                    | 76.3                    | 73.3                    | 70.0                    | 66.8                    | 63.5                    | 60.1                    | 57.0                    | 54.2                    | 51.9                    |
| Urban                           | 45049        | 58.8                    | 56.7                    | 55.6                    | 54.5                    | 51.6                    | 48.1                    | 44.6                    | 43.0                    | 41.8                    | 41.1                    | 39.8                    | 38.8                    | 36.6                    | 34.8                    | 32.8                    | 30.8                    |
| Poorer states                   | 54918        | 108.1                   | 104.0                   | 99.4                    | 95.2                    | 91.3                    | 88.4                    | 85.2                    | 81.7                    | 78.3                    | 75.2                    | 72.2                    | 68.9                    | 65.2                    | 61.9                    | 58.7                    | 56.2                    |
| Richer states                   | 39391        | 67.1                    | 64.8                    | 63.0                    | 60.8                    | 58.0                    | 54.6                    | 51.8                    | 49.8                    | 47.9                    | 45.7                    | 43.1                    | 40.8                    | 38.5                    | 36.4                    | 34.6                    | 32.7                    |

**Notes:** \*Sub-nationally estimated live births were adjusted to reflect total live births from UNPD estimates. Sub-nationally estimated neonatal, infant and under-five deaths were adjusted to reflect the total death from IGME estimates. The 90% uncertainty bounds for all-cause mortality are as per IGME estimates. †The poorer states are lower income states - Assam, Bihar, Chhattisgarh, Jharkhand, Madhya Pradesh, Odisha, Rajasthan, Uttarakhand and Uttar Pradesh - where approximately half of India's population lives.

**webappendix: Changes in cause-specific in neonatal and 1-59 month child mortality in India from 2000 to 2015**

**Appendix Table 3: Estimated annualized child deaths (thousands) in India, 2000-2015.**

|                    | Year           |                |                |                |                |                |                |                |                |                |                |                |                |                |                |                |
|--------------------|----------------|----------------|----------------|----------------|----------------|----------------|----------------|----------------|----------------|----------------|----------------|----------------|----------------|----------------|----------------|----------------|
|                    | 2000           | 2001           | 2002           | 2003           | 2004           | 2005           | 2006           | 2007           | 2008           | 2009           | 2010           | 2011           | 2012           | 2013           | 2014           | 2015           |
| Live births (M)*   | 27·9           | 27·9           | 27·9           | 27·8           | 27·7           | 27·6           | 27·5           | 27·3           | 27·1           | 26·8           | 26·6           | 26·3           | 26·1           | 26·0           | 25·9           | 25·8           |
| <b>Neonatal</b>    | <b>1,254</b>   | <b>1,216</b>   | <b>1,176</b>   | <b>1,134</b>   | <b>1,092</b>   | <b>1,054</b>   | <b>1,017</b>   | <b>982</b>     | <b>946</b>     | <b>910</b>     | <b>871</b>     | <b>831</b>     | <b>793</b>     | <b>753</b>     | <b>722</b>     | <b>696</b>     |
| Girls              | 544·2          | 527·7          | 519·3          | 505·5          | 491·5          | 482·6          | 457·8          | 440·8          | 417·6          | 405·2          | 391·9          | 368·3          | 346·1          | 329·9          | 321·6          | 328·2          |
| Boys               | 709·4          | 687·8          | 656·2          | 628·5          | 600·0          | 571·6          | 558·8          | 541·0          | 528·7          | 504·4          | 479·4          | 462·7          | 446·5          | 422·8          | 400·1          | 367·7          |
| Rural              | 1,071·2        | 1,037·7        | 1,003·1        | 966·0          | 931·3          | 897·5          | 865·6          | 835·2          | 805·9          | 774·0          | 740·1          | 706·9          | 677·9          | 646·7          | 620·4          | 598·0          |
| Urban              | 182·5          | 177·8          | 172·5          | 168·1          | 160·2          | 156·6          | 151·1          | 146·6          | 140·4          | 135·6          | 131·2          | 124·2          | 114·7          | 106·0          | 101·3          | 97·8           |
| Poorer states†     | 813·5          | 786·5          | 759·1          | 734·5          | 717·3          | 700·8          | 679·6          | 658·2          | 637·9          | 616·4          | 593·9          | 572·2          | 548·7          | 522·4          | 500·2          | 483·0          |
| Richer states      | 440·1          | 429·0          | 416·4          | 399·5          | 374·2          | 353·3          | 337·1          | 323·6          | 308·5          | 293·2          | 277·4          | 258·9          | 243·9          | 230·3          | 221·6          | 212·9          |
| <b>1-59 months</b> | <b>1,259·5</b> | <b>1,206·4</b> | <b>1,152·6</b> | <b>1,099·3</b> | <b>1,044·9</b> | <b>990·3</b>   | <b>936·7</b>   | <b>882·0</b>   | <b>829·2</b>   | <b>775·4</b>   | <b>723·8</b>   | <b>674·8</b>   | <b>622·2</b>   | <b>580·9</b>   | <b>539·0</b>   | <b>505·1</b>   |
| Girls              | 718·4          | 689·9          | 652·4          | 617·2          | 575·6          | 539·4          | 517·9          | 491·3          | 469·5          | 435·9          | 404·7          | 381·0          | 355·6          | 328·8          | 298·2          | 259·9          |
| Boys               | 541·1          | 516·5          | 500·2          | 482·1          | 469·3          | 450·9          | 418·9          | 390·7          | 359·6          | 339·5          | 319·1          | 293·8          | 266·7          | 252·1          | 240·8          | 245·2          |
| Rural              | 1,069·6        | 1,026·0        | 970·9          | 917·5          | 873·5          | 836·3          | 798·6          | 746·6          | 693·6          | 637·4          | 589·1          | 539·6          | 494·1          | 457·9          | 425·6          | 401·8          |
| Urban              | 189·8          | 180·4          | 181·7          | 181·8          | 171·4          | 154·0          | 138·1          | 135·3          | 135·5          | 138·0          | 134·7          | 135·2          | 128·2          | 123·0          | 113·4          | 103·4          |
| Poorer states      | 880·7          | 846·6          | 806·1          | 765·6          | 728·4          | 701·6          | 673·2          | 633·3          | 593·4          | 555·5          | 522·5          | 486·8          | 449·1          | 420·9          | 392·1          | 371·1          |
| Richer states      | 378·7          | 359·8          | 346·5          | 333·6          | 316·5          | 288·7          | 263·5          | 248·6          | 235·8          | 219·9          | 201·3          | 188·0          | 173·1          | 159·9          | 146·9          | 134·0          |
| <b>Under-five</b>  | <b>2,513·1</b> | <b>2,421·9</b> | <b>2,328·1</b> | <b>2,233·3</b> | <b>2,136·4</b> | <b>2,044·5</b> | <b>1,953·4</b> | <b>1,863·8</b> | <b>1,775·5</b> | <b>1,685·0</b> | <b>1,595·1</b> | <b>1,505·9</b> | <b>1,414·8</b> | <b>1,333·6</b> | <b>1,260·8</b> | <b>1,201·0</b> |
| Girls              | 1,262·6        | 1,217·6        | 1,171·7        | 1,122·7        | 1,067·1        | 1,022·0        | 975·7          | 932·1          | 887·2          | 841·1          | 796·6          | 749·4          | 701·7          | 658·7          | 619·9          | 588·1          |
| Boys               | 1,250·5        | 1,204·3        | 1,156·4        | 1,110·6        | 1,069·3        | 1,022·5        | 977·7          | 931·7          | 888·3          | 843·9          | 798·5          | 756·5          | 713·2          | 674·9          | 640·9          | 612·9          |
| Rural              | 2,140·8        | 2,063·7        | 1,973·9        | 1,883·4        | 1,804·9        | 1,733·8        | 1,664·2        | 1,581·8        | 1,499·5        | 1,411·4        | 1,329·2        | 1,246·5        | 1,171·9        | 1,104·6        | 1,046·0        | 999·8          |
| Urban              | 372·3          | 358·2          | 354·2          | 349·9          | 331·5          | 310·6          | 289·2          | 282·0          | 276·0          | 273·7          | 265·9          | 259·4          | 242·9          | 228·9          | 214·8          | 201·2          |
| Poorer states      | 1,694·3        | 1,633·1        | 1,565·2        | 1,500·1        | 1,445·8        | 1,402·5        | 1,352·8        | 1,291·5        | 1,231·2        | 1,172·0        | 1,116·4        | 1,059·0        | 997·8          | 943·3          | 892·3          | 854·1          |
| Richer states      | 818·9          | 788·8          | 762·9          | 733·2          | 690·7          | 642·0          | 600·6          | 572·3          | 544·3          | 513·1          | 478·7          | 446·9          | 417·0          | 390·3          | 368·5          | 346·9          |

**Notes:** \*Sub-nationally estimated live births were adjusted to reflect total live births from UNPD estimates. Sub-nationally estimated neonatal, infant and under-five deaths were adjusted to reflect the total death from IGME estimates. †The poorer states are lower income states - Assam, Bihar, Chhattisgarh, Jharkhand, Madhya Pradesh, Odisha, Rajasthan, Uttarakhand and Uttar Pradesh - where approximately half of India's population lives

**webappendix: Changes in cause-specific in neonatal and 1-59 month child mortality in India from 2000 to 2015**

**Appendix Table 4: Annual cause-specific mortality rate per 1000 live births in India, 2000-2015.**

| Causes of death                              | Study deaths  | Mortality rate (lower bound, upper bound) |                      |                      |                      |             |             |             |  |  | Annualized Percent Change <sup>1</sup> |  |  |
|----------------------------------------------|---------------|-------------------------------------------|----------------------|----------------------|----------------------|-------------|-------------|-------------|--|--|----------------------------------------|--|--|
|                                              |               | 2000                                      | 2005                 | 2010                 | 2015                 | 2000-05     | 2005-10     | 2010-15     |  |  |                                        |  |  |
| <b>Neonatal</b>                              |               |                                           |                      |                      |                      |             |             |             |  |  |                                        |  |  |
| Prematurity/low birthweight                  | 21,469        | 12.3 (8.9, 14.6)                          | 12.5 (9.1, 14.9)     | 14.3 (10.5, 17.0)    | 14.3 (10.5, 17.0)    | 0.4         | 2.8         | 0.0         |  |  |                                        |  |  |
| Neonatal infections*                         | 10,352        | 11.9 (6.7, 16.1)                          | 8.1 (4.5, 10.9)      | 5.7 (3.2, 7.7)       | 4.0 (2.2, 5.4)       | -7.5        | -6.7        | -6.8        |  |  |                                        |  |  |
| Birth asphyxia/trauma                        | 8,092         | 9.0 (4.0, 12.4)                           | 6.5 (2.8, 8.8)       | 3.9 (1.7, 5.4)       | 2.2 (1.0, 3.0)       | -6.5        | -9.4        | -10.9       |  |  |                                        |  |  |
| Non-communicable                             | 3,487         | 2.4 (1.2, 3.6)                            | 2.5 (1.2, 3.7)       | 2.2 (1.1, 3.3)       | 2.0 (1.0, 2.9)       | 0.7         | -2.2        | -2.1        |  |  |                                        |  |  |
| Congenital                                   | 2,194         | 1.8 (1.1, 2.3)                            | 1.7 (1.0, 2.1)       | 1.4 (0.8, 1.8)       | 1.1 (0.6, 1.4)       | -2.0        | -3.3        | -5.1        |  |  |                                        |  |  |
| Diarrhoea                                    | 1,618         | 1.6 (1.2, 1.9)                            | 1.4 (1.0, 1.7)       | 1.3 (0.9, 1.5)       | 1.1 (0.8, 1.3)       | -2.5        | -2.0        | -3.2        |  |  |                                        |  |  |
| Injuries                                     | 330           | 0.3 (0.1, 0.4)                            | 0.4 (0.2, 0.5)       | 0.3 (0.2, 0.4)       | 0.5 (0.3, 0.7)       | 6.9         | -2.6        | 10.1        |  |  |                                        |  |  |
| Tetanus                                      | 815           | 1.6 (1.0, 3.4)                            | 1.3 (0.8, 2.6)       | 0.7 (0.5, 1.5)       | 0.0                  | -4.9        | -10.2       | -43.5       |  |  |                                        |  |  |
| Other conditions†                            | 387           | 0.2 (0.1, 0.7)                            | 0.4 (0.2, 1.2)       | 0.5 (0.2, 1.4)       | 0.4 (0.2, 1.3)       | 13.3        | 3.4         | -0.9        |  |  |                                        |  |  |
| Other perinatal conditions                   | 2,981         | 3.0 (1.5, 5.3)                            | 2.8 (1.5, 5.0)       | 1.9 (1.0, 3.4)       | 1.1 (0.6, 2.0)       | -0.8        | -7.0        | -10.3       |  |  |                                        |  |  |
| Ill-defined‡                                 | 527           | 0.8 (0.4, 1.4)                            | 0.7 (0.4, 1.3)       | 0.5 (0.3, 0.9)       | 0.2 (0.1, 0.4)       | -1.3        | -7.5        | -14.7       |  |  |                                        |  |  |
| <b>All causes</b>                            | <b>52,252</b> | <b>45.0 (42, 49)</b>                      | <b>38.1 (35, 41)</b> | <b>32.8 (30, 36)</b> | <b>27.0 (24, 32)</b> | <b>-3.2</b> | <b>-3.0</b> | <b>-3.8</b> |  |  |                                        |  |  |
| <b>1-59 months</b>                           |               |                                           |                      |                      |                      |             |             |             |  |  |                                        |  |  |
| Pneumonia                                    | 11,048        | 11.2 (8.5, 12.7)                          | 8.3 (6.3, 9.4)       | 6.2 (4.7, 7.1)       | 4.2 (3.2, 4.8)       | -5.8        | -5.6        | -7.6        |  |  |                                        |  |  |
| Diarrhoea                                    | 8,524         | 9.4 (7.8, 10.6)                           | 7.2 (6.0, 8.1)       | 5.3 (4.4, 6.0)       | 3.2 (2.6, 3.6)       | -5.3        | -5.9        | -9.7        |  |  |                                        |  |  |
| Injuries                                     | 3,222         | 2.3 (2.0, 2.4)                            | 2.4 (2.1, 2.5)       | 2.2 (1.9, 2.3)       | 2.7 (2.4, 2.8)       | 1.0         | -1.6        | 4.2         |  |  |                                        |  |  |
| Non-communicable                             | 3,749         | 3.5 (2.0, 5.6)                            | 2.8 (1.6, 4.5)       | 2.6 (1.4, 4.1)       | 2.1 (1.2, 3.3)       | -4.4        | -1.8        | -4.0        |  |  |                                        |  |  |
| Other infections§                            | 4,093         | 3.4 (1.7, 5.8)                            | 3.3 (1.6, 5.6)       | 2.9 (1.4, 4.8)       | 2.1 (1.0, 3.4)       | -0.5        | -3.0        | -6.3        |  |  |                                        |  |  |
| Nutritional                                  | 1,844         | 1.5 (0.8, 2.4)                            | 1.8 (1.0, 2.8)       | 1.7 (0.9, 2.6)       | 1.1 (0.6, 1.8)       | 3.4         | -1.2        | -7.4        |  |  |                                        |  |  |
| Malaria                                      | 2,100         | 2.0 (1.1, 2.7)                            | 1.6 (0.9, 2.2)       | 1.3 (0.7, 1.8)       | 1.1 (0.6, 1.5)       | -4.3        | -3.9        | -3.1        |  |  |                                        |  |  |
| Congenital                                   | 1,604         | 1.4 (0.9, 1.6)                            | 1.3 (0.8, 1.5)       | 1.2 (0.7, 1.4)       | 1.0 (0.6, 1.2)       | -1.0        | -1.8        | -3.5        |  |  |                                        |  |  |
| Meningitis/encephalitis                      | 1,650         | 2.1 (0.9, 2.9)                            | 1.9 (0.8, 2.6)       | 1.2 (0.5, 1.7)       | 0.8 (0.3, 1.1)       | -2.0        | -8.5        | -7.3        |  |  |                                        |  |  |
| Acute bacterial sepsis and severe infections | 784           | 1.6 (0.5, 2.6)                            | 1.1 (0.3, 1.8)       | 0.5 (0.2, 0.9)       | 0.3 (0.1, 0.5)       | -7.7        | -13.3       | -9.7        |  |  |                                        |  |  |
| Measles                                      | 1,486         | 3.3 (2.1, 3.6)                            | 1.7 (1.1, 1.9)       | 0.9 (0.6, 1.0)       | 0.3 (0.2, 0.3)       | -12.0       | -11.0       | -21.8       |  |  |                                        |  |  |
| Perinatal conditions¶                        | 458           | 1.5 (0.5, 2.4)                            | 1.1 (0.4, 1.7)       | 0.0                  | 0.0                  | --          | --          | --          |  |  |                                        |  |  |
| Ill-defined‡                                 | 1,495         | 1.9 (1.1, 3.4)                            | 1.4 (0.9, 2.6)       | 1.2 (0.7, 2.3)       | 1.1 (0.7, 2.0)       | -5.2        | -2.9        | -2.1        |  |  |                                        |  |  |
| <b>All causes</b>                            | <b>42,057</b> | <b>45.2 (43, 50)</b>                      | <b>35.8 (33, 40)</b> | <b>27.2 (24, 31)</b> | <b>19.6 (15, 26)</b> | <b>-4.5</b> | <b>-5.3</b> | <b>-6.4</b> |  |  |                                        |  |  |

**Notes:** ICD-10 codes for each cause are listed in appendix pp 6-7. \*Neonatal infections are predominantly pneumonia, followed by sepsis and meningitis/encephalitis. †Other conditions for neonatal deaths include polio, measles, malaria, other infectious and parasitic diseases, and nutritional diseases. ‡Ill-defined conditions include all ICD-10 'R' codes that have not been assigned to defined cause groups. Ill-defined causes averaged 1% in neonatal death and 4% in child death, and decreased in proportion over time. §Other infections for 1-59 months deaths include TB, tetanus, polio, HIV/AIDS, and other infectious and parasitic diseases. ¶Improvement in physician cause assignment reduced the number of deaths at ages 1-59 months misclassified under perinatal conditions. For 2003-2013, causes of deaths are calculated using 3-yearly backward moving averages of death proportions from Million Death Study, then adjusted to IGME death totals. For 2000-02 and 2014-15, we extrapolated predicted values from a cubic spline polynomial fitted on 2003 to 2013 death rates. We calculated rates by dividing estimated deaths by UNPD live birth estimates for India. For cause-specific rates, lower bounds reflect the rates when two independent physicians had immediate agreement, and the upper bounds reflect the rates when either physician assigned the cause of death. We normalized both rates across all years. <sup>1</sup>The average annual percent change is the average of simple annual rates of changes in mortality.

webappendix: Changes in cause-specific in neonatal and 1-59 month child mortality in India from 2000 to 2015

Appendix Table 5a: Cause-specific neonatal mortality rates per 1000 live births by sex

| Causes of death                     |       | Mortality rate (lower bound, upper bound) |                  |                   |                   | Annualized Percent Change <sup>§</sup> |         |         |
|-------------------------------------|-------|-------------------------------------------|------------------|-------------------|-------------------|----------------------------------------|---------|---------|
|                                     |       | 2000                                      | 2005             | 2010              | 2015              | 2000-05                                | 2005-10 | 2010-15 |
| Live births in 000s                 | Boys  | 14,631                                    | 14,529           | 13,970            | 13,554            |                                        |         |         |
|                                     | Girls | 13,254                                    | 13,105           | 12,596            | 12,239            |                                        |         |         |
| Prematurity/low birthweight         | Boys  | 13.3 (9.7, 15.8)                          | 12.7 (9.2, 15.1) | 15.1 (11.0, 18.0) | 14.3 (10.4, 17.0) | -1.0                                   | 3.7     | -1.2    |
|                                     | Girls | 11.0 (8.0, 13.1)                          | 12.3 (9.0, 14.7) | 13.4 (9.8, 16.0)  | 14.5 (10.6, 17.3) | 2.3                                    | 1.7     | 1.7     |
| Neonatal infections*                | Boys  | 12.4 (6.8, 16.8)                          | 8.2 (4.5, 11.2)  | 5.7 (3.1, 7.8)    | 4.0 (2.2, 5.5)    | -7.8                                   | -7.0    | -6.6    |
|                                     | Girls | 11.4 (6.5, 15.4)                          | 7.9 (4.5, 10.7)  | 5.7 (3.2, 7.6)    | 4.0 (2.3, 5.4)    | -7.0                                   | -6.4    | -6.8    |
| Birth asphyxia/trauma               | Boys  | 10.2 (4.6, 14.0)                          | 6.8 (3.1, 9.4)   | 4.4 (2.0, 6.1)    | 2.4 (1.1, 3.4)    | -7.6                                   | -8.3    | -11.1   |
|                                     | Girls | 7.8 (3.4, 10.6)                           | 6.1 (2.7, 8.2)   | 3.4 (1.5, 4.6)    | 1.9 (0.8, 2.6)    | -4.9                                   | -10.9   | -11.0   |
| Non-communicable                    | Boys  | 2.8 (1.4, 4.0)                            | 2.7 (1.3, 3.9)   | 2.3 (1.2, 3.4)    | 1.9 (1.0, 2.8)    | -0.5                                   | -2.8    | -3.4    |
|                                     | Girls | 2.1 (1.0, 3.1)                            | 2.3 (1.1, 3.4)   | 2.2 (1.1, 3.2)    | 2.1 (1.0, 3.1)    | 2.1                                    | -1.4    | -0.5    |
| Congenital                          | Boys  | 2.0 (1.1, 2.5)                            | 1.7 (1.0, 2.2)   | 1.6 (0.9, 2.0)    | 1.1 (0.6, 1.4)    | -2.5                                   | -2.0    | -7.0    |
|                                     | Girls | 1.7 (1.0, 2.1)                            | 1.6 (1.0, 2.0)   | 1.2 (0.7, 1.5)    | 1.0 (0.6, 1.3)    | -1.5                                   | -4.9    | -2.7    |
| Diarrhoea                           | Boys  | 1.6 (1.1, 1.9)                            | 1.4 (1.0, 1.7)   | 1.2 (0.9, 1.4)    | 1.0 (0.7, 1.2)    | -2.6                                   | -3.1    | -2.5    |
|                                     | Girls | 1.6 (1.2, 2.0)                            | 1.5 (1.1, 1.7)   | 1.4 (1.0, 1.7)    | 1.1 (0.8, 1.3)    | -2.4                                   | -0.8    | -3.7    |
| Injuries                            | Boys  | 0.2 (0.1, 0.3)                            | 0.3 (0.2, 0.4)   | 0.4 (0.2, 0.5)    | 0.5 (0.3, 0.8)    | 9.0                                    | 5.8     | 7.2     |
|                                     | Girls | 0.4 (0.2, 0.5)                            | 0.5 (0.2, 0.6)   | 0.3 (0.1, 0.3)    | 0.4 (0.2, 0.6)    | 1.9                                    | -10.2   | 11.3    |
| Tetanus                             | Boys  | 1.8 (1.1, 3.7)                            | 1.4 (0.9, 2.9)   | 0.7 (0.4, 1.4)    | 0.1 (0.1, 0.3)    | -4.8                                   | -12.6   | -26.9   |
|                                     | Girls | 1.5 (0.9, 3.0)                            | 1.1 (0.7, 2.3)   | 0.8 (0.5, 1.6)    | 0.0 (0.0, 0.0)    | -5.0                                   | -7.1    | -66.9   |
| Other conditions†                   | Boys  | 0.2 (0.1, 0.7)                            | 0.4 (0.2, 1.1)   | 0.5 (0.2, 1.4)    | 0.4 (0.2, 1.1)    | 12.2                                   | 4.9     | -4.0    |
|                                     | Girls | 0.2 (0.1, 0.6)                            | 0.4 (0.2, 1.3)   | 0.4 (0.2, 1.4)    | 0.5 (0.2, 1.7)    | 17.8                                   | 1.9     | 4.0     |
| Other perinatal conditions          | Boys  | 3.3 (1.7, 5.7)                            | 3.0 (1.6, 5.3)   | 2.0 (1.0, 3.5)    | 1.2 (0.6, 2.0)    | -0.9                                   | -7.8    | -10.1   |
|                                     | Girls | 2.7 (1.4, 4.8)                            | 2.5 (1.3, 4.6)   | 1.9 (1.0, 3.4)    | 1.1 (0.6, 1.9)    | -0.8                                   | -5.8    | -10.5   |
| Ill-defined‡                        | Boys  | 0.9 (0.5, 1.6)                            | 0.8 (0.4, 1.3)   | 0.5 (0.2, 0.8)    | 0.2 (0.1, 0.3)    | -2.4                                   | -8.8    | -18.1   |
|                                     | Girls | 0.7 (0.4, 1.2)                            | 0.7 (0.3, 1.2)   | 0.5 (0.3, 0.9)    | 0.3 (0.1, 0.5)    | 0.2                                    | -5.9    | -10.8   |
| All causes                          | Boys  | 48.5                                      | 39.3             | 34.3              | 27.1              | -4.1                                   | -2.7    | -4.6    |
|                                     | Girls | 41.1                                      | 36.8             | 31.1              | 26.8              | -2.2                                   | -3.3    | -2.9    |
| Neonatal (0-28 days) deaths in 000s | Boys  | 709                                       | 572              | 479               | 368               | -4.2                                   | -3.4    | -5.2    |
|                                     | Girls | 544                                       | 483              | 392               | 328               | -2.4                                   | -4.1    | -3.4    |

Notes: ICD-10 codes for each cause are listed in appendix pp 6-7. \*Neonatal infections are predominantly pneumonia, followed by sepsis and meningitis/encephalitis. †Other conditions for neonatal deaths include polio, measles, malaria, other infectious and parasitic diseases, and nutritional diseases. ‡Ill-defined conditions include all ICD-10 'R' codes that have not been assigned to defined cause groups. Ill-defined causes averaged 1% in neonatal death and 4% in child death, and decreased in proportion over time. For 2003-2013, causes of deaths are calculated using 3-yearly backward moving averages of death proportions from Million Death Study, then adjusted to IGME death totals. For 2000-02 and 2014-15, we extrapolated predicted values from a cubic spline polynomial fitted on 2003 to 2013 death rates. We calculated rates by dividing estimated deaths by UNPD live birth estimates for India. For cause-specific rates, lower bounds reflect the rates when two independent physicians had immediate agreement, and the upper bounds reflect the rates when either physician assigned the cause of death. We normalized both rates across all years. §The average annual percent change is the average of simple annual rates of changes in mortality.

webappendix: Changes in cause-specific in neonatal and 1-59 month child mortality in India from 2000 to 2015

Appendix Table 5b: Cause-specific 1-59 month child mortality rates per 1000 live births by sex

| Causes of death                              |       | Mortality rate (lower bound, upper bound) |                 |                |                |       |        |       |         | Annualized Percent Change <sup>§</sup> |         |  |
|----------------------------------------------|-------|-------------------------------------------|-----------------|----------------|----------------|-------|--------|-------|---------|----------------------------------------|---------|--|
|                                              |       | 2000                                      | 2005            |                | 2010           |       | 2015   |       | 2000-05 | 2005-10                                | 2010-15 |  |
| Live births in 000s                          | Boys  | 14,631                                    | 14,529          |                | 13,970         |       | 13,554 |       |         |                                        |         |  |
|                                              | Girls | 13,254                                    | 13,105          |                | 12,596         |       | 12,239 |       |         |                                        |         |  |
| Pneumonia                                    | Boys  | 8.9 (6.8, 10.2)                           | 7.2 (5.5, 8.2)  | 5.2 (3.9, 5.9) | 4.0 (3.0, 4.6) | -4.2  | -6.4   | -4.9  |         |                                        |         |  |
|                                              | Girls | 13.6 (10.3, 15.5)                         | 9.5 (7.2, 10.8) | 7.4 (5.6, 8.4) | 4.4 (3.4, 5.0) | -6.9  | -4.9   | -9.6  |         |                                        |         |  |
| Diarrhoea                                    | Boys  | 7.1 (5.9, 8.1)                            | 5.9 (4.9, 6.6)  | 4.2 (3.5, 4.7) | 3.0 (2.5, 3.4) | -3.8  | -6.6   | -6.4  |         |                                        |         |  |
|                                              | Girls | 11.9 (9.9, 13.4)                          | 8.6 (7.1, 9.7)  | 6.5 (5.4, 7.4) | 3.4 (2.9, 3.9) | -6.2  | -5.3   | -12.0 |         |                                        |         |  |
| Injuries                                     | Boys  | 2.2 (2.0, 2.3)                            | 2.3 (2.1, 2.4)  | 2.1 (1.9, 2.2) | 2.4 (2.1, 2.5) | 0.8   | -1.8   | 2.7   |         |                                        |         |  |
|                                              | Girls | 2.4 (2.1, 2.5)                            | 2.5 (2.2, 2.6)  | 2.3 (2.0, 2.4) | 2.9 (2.6, 3.1) | 0.5   | -1.3   | 5.2   |         |                                        |         |  |
| Non-communicable                             | Boys  | 3.0 (1.7, 4.7)                            | 2.6 (1.5, 4.1)  | 2.2 (1.3, 3.5) | 2.2 (1.2, 3.4) | -2.5  | -3.1   | -0.4  |         |                                        |         |  |
|                                              | Girls | 4.1 (2.3, 6.7)                            | 3.0 (1.7, 4.9)  | 2.9 (1.6, 4.7) | 2.0 (1.1, 3.3) | -6.0  | -0.5   | -6.8  |         |                                        |         |  |
| Other infections*                            | Boys  | 3.0 (1.5, 4.8)                            | 3.0 (1.5, 4.9)  | 2.3 (1.2, 3.8) | 1.8 (0.9, 2.9) | 0.5   | -5.1   | -4.6  |         |                                        |         |  |
|                                              | Girls | 4.0 (1.8, 6.8)                            | 3.7 (1.7, 6.3)  | 3.5 (1.6, 5.9) | 2.3 (1.1, 4.0) | -1.4  | -1.2   | -7.7  |         |                                        |         |  |
| Nutritional                                  | Boys  | 1.2 (0.6, 1.8)                            | 1.4 (0.7, 2.1)  | 1.3 (0.7, 1.9) | 1.0 (0.5, 1.5) | 3.1   | -1.7   | -4.3  |         |                                        |         |  |
|                                              | Girls | 1.9 (1.0, 3.1)                            | 2.2 (1.2, 3.6)  | 2.1 (1.1, 3.4) | 1.3 (0.7, 2.0) | 3.6   | -0.8   | -9.6  |         |                                        |         |  |
| Malaria                                      | Boys  | 1.5 (0.8, 2.0)                            | 1.3 (0.7, 1.7)  | 1.2 (0.6, 1.6) | 1.1 (0.6, 1.5) | -3.1  | -1.6   | -0.7  |         |                                        |         |  |
|                                              | Girls | 2.5 (1.5, 3.5)                            | 1.9 (1.1, 2.6)  | 1.4 (0.8, 2.0) | 1.1 (0.7, 1.5) | -5.1  | -5.6   | -4.7  |         |                                        |         |  |
| Congenital                                   | Boys  | 1.5 (0.9, 1.7)                            | 1.3 (0.8, 1.5)  | 1.0 (0.6, 1.2) | 0.9 (0.5, 1.0) | -2.4  | -4.4   | -2.4  |         |                                        |         |  |
|                                              | Girls | 1.4 (0.8, 1.6)                            | 1.4 (0.8, 1.6)  | 1.4 (0.9, 1.6) | 1.1 (0.7, 1.3) | 0.8   | 0.6    | -4.6  |         |                                        |         |  |
| Meningitis/encephalitis                      | Boys  | 2.0 (0.8, 2.7)                            | 1.7 (0.7, 2.3)  | 1.0 (0.4, 1.4) | 0.8 (0.4, 1.1) | -3.4  | -8.9   | -4.4  |         |                                        |         |  |
|                                              | Girls | 2.3 (0.9, 3.2)                            | 2.2 (0.9, 3.0)  | 1.4 (0.6, 2.0) | 0.8 (0.3, 1.2) | -0.5  | -8.2   | -9.6  |         |                                        |         |  |
| Acute bacterial sepsis and severe infections | Boys  | 1.1 (0.4, 1.9)                            | 0.8 (0.3, 1.3)  | 0.5 (0.2, 0.8) | 0.2 (0.1, 0.4) | -6.8  | -10.3  | -14.5 |         |                                        |         |  |
|                                              | Girls | 2.1 (0.6, 3.4)                            | 1.4 (0.4, 2.2)  | 0.6 (0.2, 0.9) | 0.4 (0.1, 0.6) | -8.3  | -15.4  | -6.6  |         |                                        |         |  |
| Measles                                      | Boys  | 2.5 (1.6, 2.7)                            | 1.3 (0.9, 1.5)  | 0.8 (0.5, 0.8) | 0.1 (0.0, 0.1) | -11.5 | -10.8  | -35.1 |         |                                        |         |  |
|                                              | Girls | 4.1 (2.6, 4.5)                            | 2.1 (1.3, 2.3)  | 1.2 (0.7, 1.3) | 0.4 (0.3, 0.5) | -12.2 | -11.2  | -16.8 |         |                                        |         |  |
| Perinatal conditions†                        | Boys  | 1.3 (0.5, 2.1)                            | 0.9 (0.3, 1.5)  | 0.0 (0.0, 0.0) | -              | -6.1  | -      | -     |         |                                        |         |  |
|                                              | Girls | 1.8 (0.6, 2.8)                            | 1.2 (0.4, 1.9)  | 0.0 (0.0, 0.0) | -              | -5.9  | -      | -     |         |                                        |         |  |
| Ill-defined‡                                 | Boys  | 1.6 (1.0, 3.0)                            | 1.3 (0.8, 2.5)  | 1.1 (0.7, 2.1) | 1.0 (0.6, 1.8) | -4.1  | -3.5   | -2.3  |         |                                        |         |  |
|                                              | Girls | 2.1 (1.3, 3.9)                            | 1.5 (0.9, 2.8)  | 1.3 (0.8, 2.5) | 1.2 (0.7, 2.2) | -6.0  | -2.2   | -1.8  |         |                                        |         |  |
| All causes                                   | Boys  | 37.0                                      | 31.0            | 22.8           | 18.1           | -3.4  | -5.9   | -4.5  |         |                                        |         |  |
|                                              | Girls | 54.2                                      | 41.2            | 32.1           | 21.2           | -5.4  | -4.8   | -7.9  |         |                                        |         |  |
| Age 1-59 month child deaths in 000s          | Boys  | 541                                       | 451             | 319            | 245            | -3.6  | -6.7   | -5.1  |         |                                        |         |  |
|                                              | Girls | 718                                       | 539             | 405            | 260            | -5.6  | -5.6   | -8.4  |         |                                        |         |  |

Notes: ICD-10 codes for each cause are listed in appendix pp 6-7. \*Other infections for 1-59 months deaths include TB, tetanus, polio, HIV/AIDS, and other infectious and parasitic diseases. †Improvement in physician cause assignment reduced the number of deaths at ages 1-59 months misclassified under perinatal conditions. ‡Ill-defined conditions include all ICD-10 'R' codes that have not been assigned to defined cause groups. Ill-defined causes averaged 1% in neonatal death and 4% in child death, and decreased in proportion over time. For 2003-2013, causes of deaths are calculated using 3-yearly backward moving averages of death proportions from Million Death Study, then adjusted to IGME death totals. For 2000-02 and 2014-15, we extrapolated predicted values from a cubic spline polynomial fitted on 2003 to 2013 death rates. We calculated rates by dividing estimated deaths by UNPD live birth estimates for India. For cause-specific rates, lower bounds reflect the rates when two independent physicians had immediate agreement, and the upper bounds reflect the rates when either physician assigned the cause of death. We normalized both rates across all years. §The average annual percent change is the average of simple annual rates of changes in mortality.

webappendix: Changes in cause-specific in neonatal and 1-59 month child mortality in India from 2000 to 2015

Appendix Table 6a: Cause-specific neonatal mortality rates per 1000 live births by poorer/richer states

| Causes of death                     |        | Mortality rate (lower bound, upper bound) |                  |                   |                   | Annualized Percent Change <sup>§</sup> |         |         |
|-------------------------------------|--------|-------------------------------------------|------------------|-------------------|-------------------|----------------------------------------|---------|---------|
|                                     |        | 2000                                      | 2005             | 2010              | 2015              | 2000-05                                | 2005-10 | 2010-15 |
| Live births in 000s                 | Poorer | 15,676                                    | 15,865           | 15,469            | 15,190            |                                        |         |         |
|                                     | Richer | 12,209                                    | 11,769           | 11,097            | 10,604            |                                        |         |         |
| Prematurity/low birthweight         | Poorer | 11.3 (8.3, 13.5)                          | 13.3 (9.7, 15.8) | 16.5 (12.1, 19.7) | 17.8 (13.0, 21.1) | 3.2                                    | 4.5     | 1.5     |
|                                     | Richer | 13.5 (9.7, 15.9)                          | 11.5 (8.2, 13.5) | 11.2 (8.1, 13.3)  | 9.5 (6.8, 11.2)   | -3.2                                   | -0.4    | -3.3    |
| Neonatal infections*                | Poorer | 16.5 (9.7, 21.8)                          | 10.9 (6.4, 14.4) | 7.6 (4.5, 10.0)   | 5.1 (3.0, 6.7)    | -7.9                                   | -6.9    | -7.6    |
|                                     | Richer | 6.1 (3.0, 8.7)                            | 4.3 (2.1, 6.1)   | 3.0 (1.5, 4.3)    | 2.4 (1.2, 3.4)    | -6.7                                   | -6.5    | -4.4    |
| Birth asphyxia/trauma               | Poorer | 10.1 (4.2, 13.9)                          | 7.0 (2.9, 9.6)   | 4.0 (1.6, 5.4)    | 1.8 (0.7, 2.5)    | -7.1                                   | -10.7   | -14.4   |
|                                     | Richer | 7.4 (3.6, 10.2)                           | 5.7 (2.7, 7.8)   | 3.9 (1.9, 5.3)    | 2.8 (1.4, 3.9)    | -5.1                                   | -7.4    | -6.1    |
| Non-communicable                    | Poorer | 2.6 (1.2, 3.8)                            | 2.6 (1.2, 3.8)   | 2.6 (1.2, 3.8)    | 2.4 (1.1, 3.5)    | 0.6                                    | -0.3    | -1.3    |
|                                     | Richer | 2.4 (1.3, 3.4)                            | 2.4 (1.3, 3.5)   | 1.8 (1.0, 2.6)    | 1.4 (0.8, 2.1)    | 0.4                                    | -5.3    | -4.4    |
| Congenital                          | Poorer | 1.7 (0.9, 2.3)                            | 1.5 (0.8, 2.0)   | 1.0 (0.6, 1.4)    | 0.6 (0.3, 0.8)    | -3.1                                   | -6.4    | -9.7    |
|                                     | Richer | 2.0 (1.2, 2.4)                            | 1.9 (1.2, 2.4)   | 1.9 (1.2, 2.3)    | 1.8 (1.1, 2.2)    | -0.4                                   | -0.3    | -1.3    |
| Diarrhoea                           | Poorer | 2.0 (1.5, 2.4)                            | 1.8 (1.4, 2.2)   | 1.7 (1.3, 2.0)    | 1.5 (1.1, 1.8)    | -2.2                                   | -1.3    | -2.1    |
|                                     | Richer | 1.1 (0.8, 1.4)                            | 0.8 (0.6, 1.0)   | 0.7 (0.5, 0.8)    | 0.4 (0.3, 0.5)    | -5.1                                   | -4.5    | -9.8    |
| Injuries                            | Poorer | 0.3 (0.2, 0.5)                            | 0.4 (0.2, 0.5)   | 0.3 (0.2, 0.5)    | 0.7 (0.3, 0.9)    | 3.4                                    | -2.1    | 16.0    |
|                                     | Richer | 0.2 (0.1, 0.3)                            | 0.3 (0.2, 0.5)   | 0.3 (0.2, 0.4)    | 0.3 (0.1, 0.4)    | 15.8                                   | -2.6    | -2.7    |
| Tetanus                             | Poorer | 2.8 (1.8, 5.6)                            | 2.0 (1.3, 4.1)   | 1.2 (0.8, 2.4)    | -                 | -6.0                                   | -10.0   | -60.1   |
|                                     | Richer | 0.2 (0.1, 0.5)                            | 0.3 (0.1, 0.6)   | 0.1 (0.0, 0.2)    | 0.1 (0.0, 0.3)    | 5.5                                    | -14.6   | 1.9     |
| Other conditions†                   | Poorer | 0.1 (0.0, 0.3)                            | 0.4 (0.2, 1.4)   | 0.6 (0.2, 1.9)    | 0.5 (0.2, 1.7)    | 37.4                                   | 6.1     | -1.9    |
|                                     | Richer | 0.4 (0.2, 1.1)                            | 0.4 (0.2, 0.9)   | 0.3 (0.1, 0.8)    | 0.3 (0.1, 0.9)    | -0.8                                   | -2.1    | 0.9     |
| Other perinatal conditions          | Poorer | 3.6 (1.8, 6.3)                            | 3.4 (1.7, 6.0)   | 2.3 (1.2, 4.1)    | 1.3 (0.7, 2.4)    | -0.4                                   | -7.1    | -10.3   |
|                                     | Richer | 2.2 (1.2, 3.9)                            | 2.0 (1.1, 3.6)   | 1.4 (0.7, 2.5)    | 0.8 (0.4, 1.5)    | -1.9                                   | -6.9    | -10.0   |
| Ill-defined‡                        | Poorer | 0.9 (0.5, 1.6)                            | 0.8 (0.4, 1.5)   | 0.5 (0.3, 1.0)    | 0.2 (0.1, 0.3)    | -0.1                                   | -8.2    | -20.4   |
|                                     | Richer | 0.7 (0.4, 1.2)                            | 0.5 (0.3, 1.0)   | 0.4 (0.2, 0.7)    | 0.3 (0.2, 0.5)    | -3.3                                   | -5.9    | -6.4    |
| All causes                          | Poorer | 51.9                                      | 44.2             | 38.4              | 31.8              | -3.2                                   | -2.8    | -3.7    |
|                                     | Richer | 36.0                                      | 30.0             | 25.0              | 20.1              | -3.6                                   | -3.6    | -4.3    |
| Neonatal (0-28 days) deaths in 000s | Poorer | 814                                       | 701              | 594               | 483               | -2.9                                   | -3.3    | -4.1    |
|                                     | Richer | 440                                       | 353              | 277               | 213               | -4.3                                   | -4.7    | -5.1    |

Notes: ICD-10 codes for each cause are listed in appendix pp 6-7. \*Neonatal infections are predominantly pneumonia, followed by sepsis and meningitis/encephalitis. †Other conditions for neonatal deaths include polio, measles, malaria, other infectious and parasitic diseases, and nutritional diseases. ‡Ill-defined conditions include all ICD-10 'R' codes that have not been assigned to defined cause groups. Ill-defined causes averaged 1% in neonatal death and 4% in child death, and decreased in proportion over time. For 2003-2013, causes of deaths are calculated using 3-yearly backward moving averages of death proportions from Million Death Study, then adjusted to IGME death totals. For 2000-02 and 2014-15, we extrapolated predicted values from a cubic spline polynomial fitted on 2003 to 2013 death rates. We calculated rates by dividing estimated deaths by UNPD live birth estimates for India. For cause-specific rates, lower bounds reflect the rates when two independent physicians had immediate agreement, and the upper bounds reflect the rates when either physician assigned the cause of death. We normalized both rates across all years. §The average annual percent change is the average of simple annual rates of changes in mortality.

webappendix: Changes in cause-specific in neonatal and 1-59 month child mortality in India from 2000 to 2015

Appendix Table 6b: Cause-specific 1-59 month child mortality rates per 1000 live births by poorer/richer states

| Causes of death                              |        | Mortality rate (lower bound, upper bound) |                  |                |                | Annualized Percent Change <sup>§</sup> |         |         |
|----------------------------------------------|--------|-------------------------------------------|------------------|----------------|----------------|----------------------------------------|---------|---------|
|                                              |        | 2000                                      | 2005             | 2010           | 2015           | 2000-05                                | 2005-10 | 2010-15 |
| Live births in 000s                          | Poorer | 15,676                                    | 15,865           | 15,469         | 15,190         |                                        |         |         |
|                                              | Other  | 12,209                                    | 11,769           | 11,097         | 10,604         |                                        |         |         |
| Pneumonia                                    | Poorer | 15.4 (12.2, 17.6)                         | 11.0 (8.7, 12.6) | 8.1 (6.4, 9.3) | 5.4 (4.3, 6.1) | -6.5                                   | -5.9    | -7.8    |
|                                              | Other  | 5.7 (4.1, 6.4)                            | 4.5 (3.3, 5.2)   | 3.5 (2.5, 4.0) | 2.4 (1.7, 2.8) | -4.3                                   | -4.9    | -7.3    |
| Diarrhoea                                    | Poorer | 12.7 (10.5, 14.1)                         | 9.8 (8.2, 10.9)  | 7.3 (6.1, 8.1) | 4.5 (3.8, 5.0) | -4.9                                   | -5.8    | -9.2    |
|                                              | Other  | 5.2 (4.3, 6.1)                            | 3.6 (2.9, 4.2)   | 2.5 (2.1, 2.9) | 1.3 (1.1, 1.5) | -7.2                                   | -6.7    | -12.6   |
| Injuries                                     | Poorer | 2.3 (2.0, 2.5)                            | 2.4 (2.1, 2.5)   | 2.4 (2.1, 2.6) | 3.4 (3.0, 3.6) | 0.6                                    | 0.4     | 6.8     |
|                                              | Other  | 2.3 (2.1, 2.4)                            | 2.3 (2.1, 2.4)   | 1.8 (1.7, 1.9) | 1.6 (1.5, 1.7) | 0.9                                    | -4.8    | -2.4    |
| Non-communicable                             | Poorer | 3.5 (1.9, 5.5)                            | 3.0 (1.6, 4.8)   | 2.8 (1.5, 4.5) | 2.4 (1.3, 3.8) | -2.6                                   | -1.7    | -2.9    |
|                                              | Other  | 3.6 (2.1, 5.7)                            | 2.5 (1.5, 3.9)   | 2.3 (1.3, 3.5) | 1.7 (1.0, 2.6) | -6.7                                   | -2.0    | -5.9    |
| Other infections*                            | Poorer | 4.4 (2.1, 7.5)                            | 4.1 (1.9, 7.0)   | 3.6 (1.7, 6.1) | 2.4 (1.1, 4.1) | -1.1                                   | -2.6    | -7.5    |
|                                              | Other  | 2.2 (1.1, 3.6)                            | 2.3 (1.1, 3.7)   | 1.8 (0.9, 3.0) | 1.6 (0.7, 2.5) | 0.5                                    | -4.2    | -3.2    |
| Nutritional                                  | Poorer | 2.2 (1.2, 3.3)                            | 2.5 (1.4, 3.8)   | 2.1 (1.2, 3.2) | 1.4 (0.8, 2.1) | 3.7                                    | -3.4    | -7.2    |
|                                              | Other  | 0.6 (0.3, 0.9)                            | 0.8 (0.4, 1.3)   | 1.1 (0.5, 1.8) | 0.8 (0.4, 1.4) | 7.2                                    | 6.7     | -4.4    |
| Malaria                                      | Poorer | 2.8 (1.6, 3.9)                            | 1.9 (1.1, 2.7)   | 1.8 (1.0, 2.4) | 1.4 (0.8, 2.0) | -6.9                                   | -2.0    | -3.9    |
|                                              | Other  | 1.0 (0.6, 1.3)                            | 1.1 (0.7, 1.5)   | 0.7 (0.4, 0.9) | 0.6 (0.4, 0.8) | 3.7                                    | -9.5    | -1.6    |
| Congenital                                   | Poorer | 1.1 (0.6, 1.3)                            | 1.0 (0.5, 1.1)   | 0.9 (0.5, 1.1) | 0.7 (0.4, 0.8) | -2.2                                   | -0.8    | -5.5    |
|                                              | Other  | 1.8 (1.2, 2.1)                            | 1.9 (1.2, 2.1)   | 1.6 (1.0, 1.8) | 1.5 (0.9, 1.7) | 0.4                                    | -2.5    | -2.0    |
| Meningitis/encephalitis                      | Poorer | 2.1 (0.9, 2.9)                            | 2.2 (0.9, 2.9)   | 1.4 (0.6, 1.9) | 1.1 (0.5, 1.5) | 1.0                                    | -8.0    | -5.0    |
|                                              | Other  | 2.1 (0.9, 3.0)                            | 1.6 (0.6, 2.2)   | 0.9 (0.4, 1.3) | 0.5 (0.2, 0.6) | -5.9                                   | -9.8    | -13.4   |
| Acute bacterial sepsis and severe infections | Poorer | 1.9 (0.7, 3.2)                            | 1.3 (0.4, 2.1)   | 0.5 (0.2, 0.9) | 0.3 (0.1, 0.5) | -7.5                                   | -15.4   | -9.1    |
|                                              | Other  | 1.2 (0.3, 1.9)                            | 0.8 (0.2, 1.2)   | 0.5 (0.1, 0.8) | 0.3 (0.1, 0.4) | -8.2                                   | -9.3    | -10.7   |
| Measles                                      | Poorer | 4.2 (2.8, 4.5)                            | 2.3 (1.5, 2.5)   | 1.3 (0.8, 1.3) | 0.4 (0.3, 0.4) | -11.1                                  | -11.2   | -19.5   |
|                                              | Other  | 2.2 (1.3, 2.4)                            | 0.9 (0.6, 1.0)   | 0.5 (0.3, 0.6) | 0.0 (0.0, 0.0) | -14.7                                  | -10.8   | -33.9   |
| Perinatal conditions†                        | Poorer | 1.6 (0.5, 2.6)                            | 1.0 (0.3, 1.7)   | 0.0 (0.0, 0.0) | -              | -7.2                                   | -       | -       |
|                                              | Other  | 1.5 (0.6, 2.2)                            | 1.1 (0.4, 1.6)   | 0.0 (0.0, 0.0) | -              | -4.6                                   | -       | -       |
| Ill-defined‡                                 | Poorer | 2.0 (1.2, 3.7)                            | 1.6 (1.0, 3.0)   | 1.5 (0.9, 2.7) | 1.3 (0.8, 2.4) | -4.2                                   | -1.5    | -1.8    |
|                                              | Other  | 1.7 (1.0, 3.2)                            | 1.2 (0.7, 2.2)   | 0.9 (0.5, 1.6) | 0.7 (0.5, 1.4) | -7.0                                   | -6.0    | -2.7    |
| All causes                                   | Poorer | 56.2                                      | 44.2             | 33.8           | 24.4           | -4.7                                   | -5.2    | -6.3    |
|                                              | Other  | 31.0                                      | 24.5             | 18.1           | 12.6           | -4.6                                   | -5.8    | -7.0    |
| Age 1-59 month child deaths in 000s          | Poorer | 881                                       | 702              | 522            | 371            | -4.4                                   | -5.7    | -6.6    |
|                                              | Other  | 379                                       | 289              | 201            | 134            | -5.3                                   | -6.9    | -7.8    |

Notes: ICD-10 codes for each cause are listed in appendix pp 6-7. \*Other infections for 1-59 months deaths include TB, tetanus, polio, HIV/AIDS, and other infectious and parasitic diseases. †Improvement in physician cause assignment reduced the number of deaths at ages 1-59 months misclassified under perinatal conditions. ‡Ill-defined conditions include all ICD-10 'R' codes that have not been assigned to defined cause groups. Ill-defined causes averaged 1% in neonatal death and 4% in child death, and decreased in proportion over time. For 2003-2013, causes of deaths are calculated using 3-yearly backward moving averages of death proportions from Million Death Study, then adjusted to IGME death totals. For 2000-02 and 2014-15, we extrapolated predicted values from a cubic spline polynomial fitted on 2003 to 2013 death rates. We calculated rates by dividing estimated deaths by UNPD live birth estimates for India. For cause-specific rates, lower bounds reflect the rates when two independent physicians had immediate agreement, and the upper bounds reflect the rates when either physician assigned the cause of death. We normalized both rates across all years. §The average annual percent change is the average of simple annual rates of changes in mortality.

webappendix: Changes in cause-specific in neonatal and 1-59 month child mortality in India from 2000 to 2015

Appendix Table 7a: Cause-specific neonatal mortality rates per 1000 live births by rural/urban

| Causes of death                     |       | Mortality rate (lower bound, upper bound) |                   |                   |                   |      |        |       |         | Annualized Percent Change <sup>§</sup> |         |  |
|-------------------------------------|-------|-------------------------------------------|-------------------|-------------------|-------------------|------|--------|-------|---------|----------------------------------------|---------|--|
|                                     |       | 2000                                      | 2005              |                   | 2010              |      | 2015   |       | 2000-05 | 2005-10                                | 2010-15 |  |
| Live births in 000s                 | Rural | 21,550                                    | 21,172            |                   | 19,886            |      | 19,253 |       |         |                                        |         |  |
|                                     | Urban | 6,334                                     | 6,462             |                   | 6,680             |      | 6,540  |       |         |                                        |         |  |
| Prematurity/low birthweight         | Rural | 13.2 (9.5, 15.8)                          | 14.0 (10.1, 16.6) | 16.6 (11.9, 19.7) | 17.0 (12.3, 20.3) | 1.1  | 3.5    | 0.6   |         |                                        |         |  |
|                                     | Urban | 8.8 (6.6, 10.3)                           | 8.0 (6.0, 9.4)    | 7.9 (5.9, 9.3)    | 6.6 (5.0, 7.7)    | -1.9 | -0.2   | -3.4  |         |                                        |         |  |
| Neonatal infections*                | Rural | 13.9 (7.8, 18.8)                          | 9.5 (5.3, 12.8)   | 6.8 (3.8, 9.1)    | 4.6 (2.6, 6.3)    | -7.4 | -6.5   | -7.2  |         |                                        |         |  |
|                                     | Urban | 5.2 (2.8, 7.2)                            | 3.6 (2.0, 5.0)    | 2.6 (1.4, 3.6)    | 2.2 (1.2, 3.0)    | -6.9 | -6.4   | -3.3  |         |                                        |         |  |
| Birth asphyxia/trauma               | Rural | 9.9 (4.3, 13.5)                           | 7.2 (3.1, 9.8)    | 4.4 (1.9, 6.0)    | 2.4 (1.1, 3.4)    | -6.2 | -9.4   | -10.8 |         |                                        |         |  |
|                                     | Urban | 6.0 (2.8, 8.1)                            | 4.1 (1.9, 5.5)    | 2.6 (1.2, 3.5)    | 1.5 (0.7, 2.1)    | -7.4 | -8.5   | -10.0 |         |                                        |         |  |
| Non-communicable                    | Rural | 2.5 (1.2, 3.7)                            | 2.6 (1.3, 3.9)    | 2.4 (1.2, 3.6)    | 2.3 (1.1, 3.3)    | 1.0  | -1.6   | -1.4  |         |                                        |         |  |
|                                     | Urban | 2.0 (1.0, 2.9)                            | 2.0 (1.0, 2.8)    | 1.6 (0.8, 2.3)    | 1.2 (0.6, 1.7)    | 0.0  | -4.2   | -5.6  |         |                                        |         |  |
| Congenital                          | Rural | 1.7 (1.0, 2.2)                            | 1.5 (0.9, 2.0)    | 1.3 (0.8, 1.7)    | 0.9 (0.6, 1.2)    | -2.3 | -2.7   | -6.6  |         |                                        |         |  |
|                                     | Urban | 2.1 (1.3, 2.5)                            | 1.8 (1.1, 2.2)    | 1.5 (0.9, 1.8)    | 1.2 (0.7, 1.5)    | -2.4 | -4.0   | -3.2  |         |                                        |         |  |
| Diarrhoea                           | Rural | 1.8 (1.4, 2.2)                            | 1.6 (1.2, 1.9)    | 1.5 (1.1, 1.8)    | 1.3 (1.0, 1.6)    | -2.9 | -1.2   | -1.9  |         |                                        |         |  |
|                                     | Urban | 0.8 (0.6, 1.0)                            | 0.8 (0.6, 1.0)    | 0.6 (0.4, 0.7)    | 0.2 (0.2, 0.3)    | -0.1 | -5.5   | -15.9 |         |                                        |         |  |
| Injuries                            | Rural | 0.3 (0.1, 0.4)                            | 0.4 (0.2, 0.6)    | 0.3 (0.2, 0.4)    | 0.6 (0.3, 0.8)    | 9.7  | -6.7   | 14.6  |         |                                        |         |  |
|                                     | Urban | 0.2 (0.1, 0.2)                            | 0.2 (0.1, 0.2)    | 0.3 (0.1, 0.4)    | 0.3 (0.1, 0.4)    | 1.4  | 11.9   | 1.1   |         |                                        |         |  |
| Tetanus                             | Rural | 2.0 (1.3, 4.2)                            | 1.5 (0.9, 3.1)    | 0.8 (0.5, 1.7)    | 0.0               | -5.6 | -11.0  | -58.4 |         |                                        |         |  |
|                                     | Urban | 0.5 (0.3, 0.7)                            | 0.6 (0.3, 0.9)    | 0.5 (0.3, 0.7)    | 0.2 (0.1, 0.3)    | 5.7  | -4.0   | -14.6 |         |                                        |         |  |
| Other conditions†                   | Rural | 0.2 (0.1, 0.7)                            | 0.4 (0.2, 1.2)    | 0.5 (0.2, 1.7)    | 0.4 (0.2, 1.4)    | 10.6 | 6.7    | -3.5  |         |                                        |         |  |
|                                     | Urban | 0.5 (0.2, 1.2)                            | 0.5 (0.2, 1.2)    | 0.3 (0.1, 0.7)    | 0.4 (0.2, 0.9)    | 0.2  | -9.5   | 5.3   |         |                                        |         |  |
| Other perinatal conditions          | Rural | 3.2 (1.7, 5.7)                            | 3.0 (1.6, 5.4)    | 2.1 (1.1, 3.7)    | 1.1 (0.6, 2.0)    | -0.7 | -7.0   | -11.2 |         |                                        |         |  |
|                                     | Urban | 2.1 (1.1, 3.6)                            | 2.0 (1.1, 3.4)    | 1.4 (0.8, 2.4)    | 1.0 (0.5, 1.7)    | -1.1 | -6.2   | -7.4  |         |                                        |         |  |
| Ill-defined‡                        | Rural | 0.8 (0.4, 1.5)                            | 0.7 (0.3, 1.2)    | 0.5 (0.3, 0.9)    | 0.3 (0.1, 0.4)    | -3.6 | -5.3   | -11.6 |         |                                        |         |  |
|                                     | Urban | 0.7 (0.4, 1.1)                            | 0.8 (0.4, 1.3)    | 0.4 (0.2, 0.7)    | 0.1 (0.1, 0.2)    | 5.6  | -12.1  | -21.7 |         |                                        |         |  |
| All causes                          | Rural | 49.7                                      | 42.4              | 37.2              | 31.1              | -3.1 | -2.6   | -3.6  |         |                                        |         |  |
|                                     | Urban | 28.8                                      | 24.2              | 19.6              | 15.0              | -3.4 | -4.1   | -5.3  |         |                                        |         |  |
| Neonatal (0-28 days) deaths in 000s | Rural | 1,071                                     | 898               | 740               | 598               | -3.5 | -3.8   | -4.2  |         |                                        |         |  |
|                                     | Urban | 182                                       | 157               | 131               | 98                | -3.0 | -3.5   | -5.7  |         |                                        |         |  |

Notes: ICD-10 codes for each cause are listed in appendix pp 6-7. \*Neonatal infections are predominantly pneumonia, followed by sepsis and meningitis/encephalitis. †Other conditions for neonatal deaths include polio, measles, malaria, other infectious and parasitic diseases, and nutritional diseases. ‡Ill-defined conditions include all ICD-10 'R' codes that have not been assigned to defined cause groups. Ill-defined causes averaged 1% in neonatal death and 4% in child death, and decreased in proportion over time. For 2003-2013, causes of deaths are calculated using 3-yearly backward moving averages of death proportions from Million Death Study, then adjusted to IGME death totals. For 2000-02 and 2014-15, we extrapolated predicted values from a cubic spline polynomial fitted on 2003 to 2013 death rates. We calculated rates by dividing estimated deaths by UNPD live birth estimates for India. For cause-specific rates, lower bounds reflect the rates when two independent physicians had immediate agreement, and the upper bounds reflect the rates when either physician assigned the cause of death. We normalized both rates across all years. §The average annual percent change is the average of simple annual rates of changes in mortality.



webappendix: Changes in cause-specific in neonatal and 1-59 month child mortality in India from 2000 to 2015

Appendix Table 7b: Cause-specific 1-59 month child mortality rates per 1000 live births by rural/urban

| Causes of death                              |       | Mortality rate (lower bound, upper bound) |                 |  |                |  |                |  |         | Annualized Percent Change <sup>§</sup> |         |  |
|----------------------------------------------|-------|-------------------------------------------|-----------------|--|----------------|--|----------------|--|---------|----------------------------------------|---------|--|
|                                              |       | 2000                                      | 2005            |  | 2010           |  | 2015           |  | 2000-05 | 2005-10                                | 2010-15 |  |
| Live births in 000s                          | Rural | 21,550                                    | 21,172          |  | 19,886         |  | 19,253         |  |         |                                        |         |  |
|                                              | Urban | 6,334                                     | 6,462           |  | 6,680          |  | 6,540          |  |         |                                        |         |  |
| Pneumonia                                    | Rural | 13.0 (9.9, 14.9)                          | 9.6 (7.3, 11.0) |  | 7.0 (5.3, 8.0) |  | 4.5 (3.4, 5.2) |  | -5.9    | -6.1                                   | -8.3    |  |
|                                              | Urban | 5.5 (4.3, 6.2)                            | 4.3 (3.3, 4.8)  |  | 4.0 (3.1, 4.5) |  | 3.1 (2.4, 3.5) |  | -4.9    | -1.2                                   | -4.8    |  |
| Diarrhoea                                    | Rural | 10.7 (8.9, 12.1)                          | 8.3 (6.9, 9.4)  |  | 6.0 (5.0, 6.8) |  | 3.5 (2.9, 4.0) |  | -4.9    | -6.2                                   | -10.1   |  |
|                                              | Urban | 5.2 (4.3, 5.7)                            | 3.9 (3.2, 4.3)  |  | 3.1 (2.6, 3.4) |  | 2.3 (1.9, 2.6) |  | -5.6    | -4.1                                   | -5.4    |  |
| Injuries                                     | Rural | 2.4 (2.2, 2.6)                            | 2.4 (2.2, 2.5)  |  | 2.3 (2.1, 2.5) |  | 2.8 (2.5, 3.0) |  | -0.3    | -0.3                                   | 3.7     |  |
|                                              | Urban | 1.6 (1.4, 1.7)                            | 2.1 (1.8, 2.3)  |  | 1.7 (1.4, 1.8) |  | 2.3 (2.0, 2.4) |  | 6.4     | -4.7                                   | 6.8     |  |
| Non-communicable                             | Rural | 3.7 (2.1, 5.9)                            | 2.9 (1.6, 4.7)  |  | 2.6 (1.5, 4.2) |  | 2.0 (1.1, 3.3) |  | -4.3    | -2.4                                   | -4.8    |  |
|                                              | Urban | 2.8 (1.6, 4.4)                            | 2.3 (1.3, 3.6)  |  | 2.4 (1.4, 3.8) |  | 2.2 (1.3, 3.4) |  | -3.8    | 1.0                                    | -2.0    |  |
| Other infections*                            | Rural | 3.9 (1.9, 6.5)                            | 3.7 (1.8, 6.3)  |  | 3.1 (1.5, 5.2) |  | 2.2 (1.0, 3.7) |  | -0.7    | -3.5                                   | -6.6    |  |
|                                              | Urban | 2.0 (1.0, 3.1)                            | 2.1 (1.0, 3.4)  |  | 2.1 (1.0, 3.4) |  | 1.6 (0.8, 2.6) |  | 1.6     | 0.1                                    | -5.5    |  |
| Nutritional                                  | Rural | 1.7 (0.9, 2.6)                            | 2.0 (1.1, 3.1)  |  | 1.8 (1.0, 2.8) |  | 1.2 (0.6, 1.8) |  | 4.2     | -1.9                                   | -7.8    |  |
|                                              | Urban | 1.0 (0.5, 1.4)                            | 1.1 (0.6, 1.6)  |  | 1.4 (0.7, 1.9) |  | 1.1 (0.6, 1.5) |  | 2.3     | 3.9                                    | -4.0    |  |
| Malaria                                      | Rural | 2.3 (1.3, 3.2)                            | 1.9 (1.1, 2.6)  |  | 1.5 (0.9, 2.0) |  | 1.2 (0.7, 1.7) |  | -4.0    | -4.4                                   | -3.3    |  |
|                                              | Urban | 0.8 (0.4, 1.1)                            | 0.7 (0.4, 0.9)  |  | 0.8 (0.4, 1.1) |  | 0.7 (0.4, 1.0) |  | -2.4    | 3.7                                    | -2.0    |  |
| Congenital                                   | Rural | 1.2 (0.7, 1.4)                            | 1.2 (0.7, 1.3)  |  | 1.1 (0.7, 1.3) |  | 0.9 (0.5, 1.0) |  | -0.8    | -0.2                                   | -4.7    |  |
|                                              | Urban | 2.0 (1.3, 2.2)                            | 1.7 (1.1, 1.8)  |  | 1.4 (0.9, 1.5) |  | 1.3 (0.8, 1.4) |  | -3.5    | -3.2                                   | -2.0    |  |
| Meningitis/encephalitis                      | Rural | 2.1 (0.9, 2.9)                            | 1.9 (0.8, 2.7)  |  | 1.3 (0.5, 1.8) |  | 1.0 (0.4, 1.4) |  | -1.7    | -7.5                                   | -4.6    |  |
|                                              | Urban | 1.9 (0.8, 2.6)                            | 1.6 (0.7, 2.2)  |  | 1.0 (0.4, 1.3) |  | 0.3 (0.1, 0.4) |  | -3.0    | -10.2                                  | -21.4   |  |
| Acute bacterial sepsis and severe infections | Rural | 1.7 (0.5, 2.9)                            | 1.1 (0.3, 1.9)  |  | 0.5 (0.2, 0.9) |  | 0.3 (0.1, 0.5) |  | -7.6    | -13.3                                  | -9.8    |  |
|                                              | Urban | 1.1 (0.3, 1.6)                            | 0.8 (0.2, 1.1)  |  | 0.5 (0.1, 0.6) |  | 0.2 (0.1, 0.3) |  | -7.2    | -9.9                                   | -12.2   |  |
| Measles                                      | Rural | 3.6 (2.3, 3.8)                            | 1.9 (1.2, 2.1)  |  | 1.0 (0.6, 1.1) |  | 0.3 (0.2, 0.3) |  | -11.3   | -12.3                                  | -19.4   |  |
|                                              | Urban | 2.3 (1.6, 2.5)                            | 1.0 (0.7, 1.1)  |  | 0.8 (0.5, 0.8) |  | 0.2 (0.1, 0.2) |  | -14.0   | -5.5                                   | -26.5   |  |
| Perinatal conditions†                        | Rural | 1.5 (0.6, 2.4)                            | 1.1 (0.4, 1.7)  |  | 0.0 (0.0, 0.1) |  | -              |  | -4.9    | -                                      | -       |  |
|                                              | Urban | 2.0 (0.5, 2.9)                            | 1.1 (0.2, 1.6)  |  | 0.0 (0.0, 0.0) |  | -              |  | -11.1   | -                                      | -       |  |
| Ill-defined‡                                 | Rural | 1.9 (1.1, 3.6)                            | 1.5 (0.9, 2.9)  |  | 1.2 (0.7, 2.4) |  | 1.1 (0.7, 2.2) |  | -4.6    | -3.7                                   | -1.3    |  |
|                                              | Urban | 1.7 (1.0, 2.7)                            | 1.1 (0.7, 1.8)  |  | 1.1 (0.7, 1.8) |  | 0.8 (0.5, 1.3) |  | -8.0    | 0.1                                    | -6.3    |  |
| All causes                                   | Rural | 49.6                                      | 39.5            |  | 29.6           |  | 20.9           |  | -4.5    | -5.6                                   | -6.8    |  |
|                                              | Urban | 30.0                                      | 23.8            |  | 20.2           |  | 15.8           |  | -4.4    | -3.2                                   | -4.7    |  |
| Age 1-59 month child deaths in 000s          | Rural | 1,070                                     | 836             |  | 589            |  | 402            |  | -4.8    | -6.8                                   | -7.4    |  |
|                                              | Urban | 190                                       | 154             |  | 135            |  | 103            |  | -4.0    | -2.6                                   | -5.1    |  |

Notes: ICD-10 codes for each cause are listed in appendix pp 6-7. \*Other infections for 1-59 months deaths include TB, tetanus, polio, HIV/AIDS, and other infectious and parasitic diseases. †Improvement in physician cause assignment reduced the number of deaths at ages 1-59 months misclassified under perinatal conditions. ‡Ill-defined conditions include all ICD-10 'R' codes that have not been assigned to defined cause groups. Ill-defined causes averaged 1% in neonatal death and 4% in child death, and decreased in proportion over time.

For 2003-2013, causes of deaths are calculated using 3-yearly backward moving averages of death proportions from Million Death Study, then adjusted to IGME death totals. For 2000-02 and 2014-15, we extrapolated predicted values from a cubic spline polynomial fitted on 2003 to 2013 death rates. We calculated rates by dividing estimated deaths by UNPD live birth estimates for India. For cause-specific rates, lower bounds reflect the rates when two independent physicians had immediate agreement, and the upper bounds reflect the rates when either physician assigned the cause of death. We normalized both rates across all years. §The average annual percent change is the average of simple annual rates of changes in mortality.

**webappendix: Changes in cause-specific in neonatal and 1-59 month child mortality in India from 2000 to 2015**

**Appendix Table 8:** Change in rank of COD and estimated deaths (thousands) for neonates and 1-59 month child deaths in India from 2000 to 2005 to 2015

| Estimated deaths (2000)                         |             | Estimated deaths (2005)                          |             | Estimated deaths (2015)                          |            |
|-------------------------------------------------|-------------|--------------------------------------------------|-------------|--------------------------------------------------|------------|
| <b>Neonates</b>                                 |             | <b>Neonates</b>                                  |             | <b>Neonates</b>                                  |            |
| 1. Prematurity/low birthweight                  | 342         | 1. Prematurity/low birthweight                   | 345         | 1. Prematurity/low birthweight                   | 370        |
| 2. Neonatal infections                          | 333         | 2. Neonatal infections                           | 223         | 2. Neonatal infections                           | 103        |
| 3. Birth asphyxia/trauma                        | 252         | 3. Birth asphyxia/trauma                         | 178         | 3. Birth asphyxia/trauma                         | 57         |
| 4. Non-communicable                             | 68          | 4. Non-communicable                              | 70          | 4. Non-communicable                              | 52         |
| 5. Congenital                                   | 51          | 5. Congenital                                    | 46          | 5. Congenital                                    | 28         |
| 6. Tetanus                                      | 46          | 6. Diarrhoea                                     | 37          | 6. Diarrhoea                                     | 27         |
| 7. Diarrhoea                                    | 44          | 7. Tetanus                                       | 35          | 7. Injuries                                      | 13         |
| 8. Injuries                                     | 7           | 8. Injuries                                      | 10          | 8. Tetanus                                       | 0.6        |
| All other defined causes                        | 89          | All other defined causes                         | 89          | All other defined causes                         | 41         |
| Ill-defined                                     | 22          | Ill-defined                                      | 20          | Ill-defined                                      | 6          |
| <b>All causes</b>                               | <b>1254</b> | <b>All causes</b>                                | <b>1054</b> | <b>All causes</b>                                | <b>696</b> |
| <b>1-59 months</b>                              |             | <b>1-59 months</b>                               |             | <b>1-59 months</b>                               |            |
| 1. Pneumonia                                    | 311         | 1. Pneumonia                                     | 229         | 1. Pneumonia                                     | 108        |
| 2. Diarrhoea                                    | 262         | 2. Diarrhoea                                     | 198         | 2. Diarrhoea                                     | 82         |
| 3. Non-communicable                             | 98          | 3. Other infections                              | 92          | 3. Injuries                                      | 69         |
| 4. Other infections                             | 96          | 4. Non-communicable                              | 78          | 4. Non-communicable                              | 54         |
| 5. Measles                                      | 92          | 5. Injuries                                      | 66          | 5. Other infections                              | 53         |
| 6. Injuries                                     | 63          | 6. Meningitis/encephalitis                       | 53          | 6. Nutritional                                   | 29         |
| 7. Meningitis/encephalitis                      | 59          | 7. Nutritional                                   | 49          | 7. Malaria                                       | 28         |
| 8. Malaria                                      | 55          | 8. Measles                                       | 47          | 8. Congenital                                    | 26         |
| 9. Acute bacterial sepsis and severe infections | 44          | 9. Malaria                                       | 44          | 9. Meningitis/encephalitis                       | 22         |
| 10. Nutritional                                 | 43          | 10. Congenital                                   | 37          | 10. Acute bacterial sepsis and severe infections | 8          |
| 11. Congenital                                  | 40          | 11. Acute bacterial sepsis and severe infections | 29          | 11. Measles                                      | 7          |
| All other defined causes                        | 43          | All other defined causes                         | 29          | All other defined causes                         | --         |
| Ill-defined                                     | 52          | Ill-defined                                      | 39          | Ill-defined                                      | 20         |
| <b>All causes</b>                               | <b>1259</b> | <b>All causes</b>                                | <b>990</b>  | <b>All causes</b>                                | <b>505</b> |

**webappendix: Changes in cause-specific in neonatal and 1-59 month child mortality in India from 2000 to 2015**

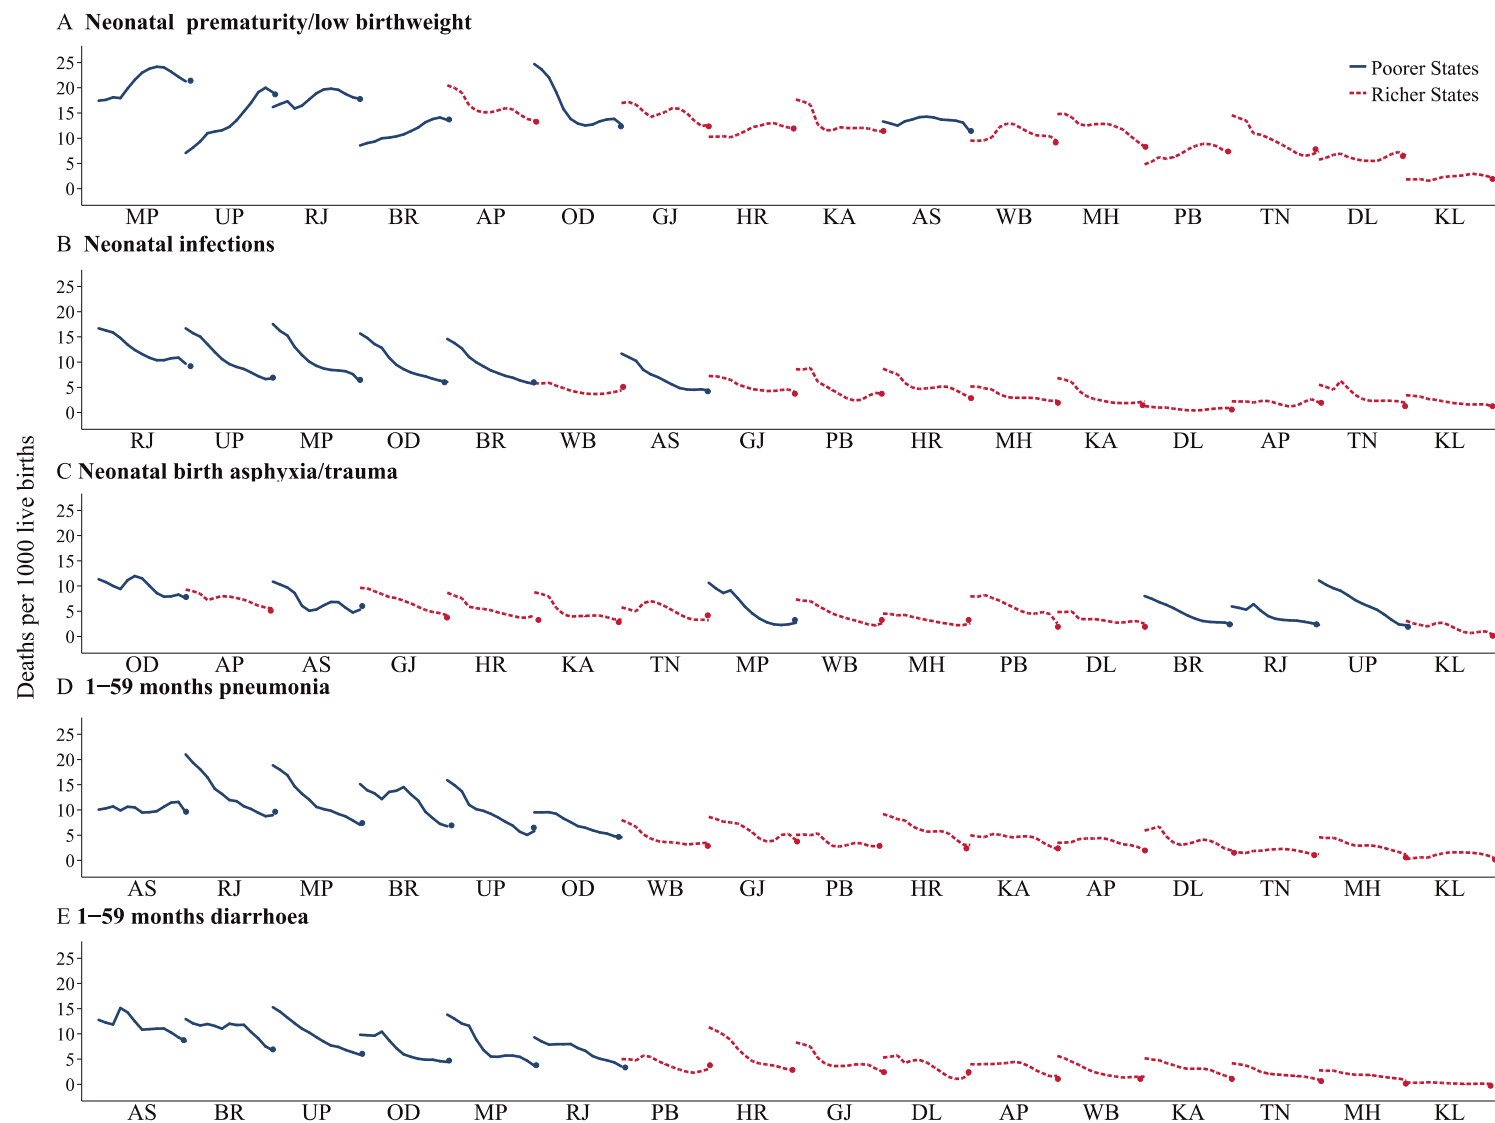

**Appendix Figure 2: Cause-specific child mortality rates for top five causes of death in richer and poorer states in India, 2001-2013.** States are ordered by decreasing 2013 cause-specific mortality rate. Richer states include Andhra Pradesh (AP), Delhi (DL), Gujarat (GJ), Haryana (HR), Karnataka (KA), Kerala (KL), Maharashtra (MH), Punjab (PB), Tamil Nadu (TN), and West Bengal (WB). Poorer states include Assam (AS), Bihar (BR), Madhya Pradesh (MP), Odisha (OD), Rajasthan (RJ), and Uttar Pradesh (UP). Each horizontal axis shows the 2001-13 trends in mortality rates.
